## Gallocin A, an atypical two-peptide bacteriocin with intramolecular disulfide bonds required for activity

Alexis Proutière, <sup>1¶\*</sup> Laurence du Merle, <sup>1</sup> Marta Garcia-Lopez, <sup>1</sup> Corentin Léger, <sup>2</sup> Alexis Voegele, <sup>2</sup> Alexandre Chenal, <sup>2</sup> Antony Harrington, <sup>3</sup> Yftah Tal-Gan, <sup>3</sup> Thomas Cokelaer, <sup>4,5</sup> Patrick Trieu-Cuot, <sup>1</sup> and Shaynoor Dramsi <sup>1\*</sup>

<sup>1</sup> Institut Pasteur, Université Paris Cité, CNRS UMR6047, Biology of Gram-positive Pathogens Unit, Paris 75015 France.

<sup>2</sup> Institut Pasteur, Université Paris Cité, CNRS UMR3528, Biochemistry of Macromolecular Interactions Unit, Paris 75015 France

<sup>3</sup> University of Nevada, Reno, Department of Chemistry, Reno NV 89557, USA

<sup>4</sup> Institut Pasteur, Université Paris Cité, Plate-forme Technologique Biomics, F-75015 Paris, France

<sup>5</sup> Institut Pasteur, Université Paris Cité, Bioinformatics and Biostatistics Hub, F-75015 Paris, France

<sup>¶</sup> Present address: Laboratory of Molecular Microbiology, Global Health Institute, School of Life Sciences, Ecole Polytechnique Fédérale de Lausanne (EPFL), Lausanne, Switzerland.

\* Correspondence: Shaynoor Dramsi, [shaynoor.dramsi@pasteur.fr](mailto:shaynoor.dramsi@pasteur.fr) or Alexis Proutière [alexis.proutiere@epfl.ch](mailto:alexis.proutiere@epfl.ch)

**Running title:** Gallocin A, an atypical class IIb bacteriocin

**Keywords:** class IIb bacteriocin, antimicrobial peptides, immunity peptide, disulfide bond

## 1 **ABSTRACT**

2 *Streptococcus gallolyticus* subsp. *gallolyticus* (*SGG*) is an opportunistic gut pathogen  
3 associated with colorectal cancer. We previously showed that colonization of the murine  
4 colon by *SGG* in tumoral conditions was strongly enhanced by the production of gallocin A, a  
5 two-peptide bacteriocin. Here, we aimed at characterizing the mechanisms of its action and  
6 resistance. Using a genetic approach, we demonstrated that gallocin A is composed of two  
7 peptides, GIIA1 and GIIA2, which are inactive alone and act together to kill “target” bacteria.  
8 We showed that gallocin A can kill phylogenetically close relatives. Importantly, we  
9 demonstrated that gallocin A peptides can insert into membranes and permeabilize lipid  
10 bilayer vesicles. Next, we showed that the third gene of the gallocin A operon named GIP, is  
11 necessary and sufficient to confer immunity to gallocin A. Structural modelling of GIIA1 and  
12 GIIA2 mature peptides suggested that both peptides form alpha-helical hairpins stabilized by  
13 intramolecular disulfide bridges. The presence of a disulfide bond in GIIA1 and GIIA2 was  
14 confirmed experimentally. Addition of disulfide reducing agents abrogated gallocin A  
15 activity. Likewise, deletion of a gene encoding a surface protein with a thioredoxin-like  
16 domain impaired gallocin A ability to kill *Enterococcus faecalis*. Structural modelling of GIP  
17 revealed a hairpin-like structure strongly resembling that of the GIIA1 and GIIA2 mature  
18 peptides, suggesting a mechanism of immunity by competition with GIIA1/2. Finally,  
19 identification of other class IIb bacteriocins exhibiting a similar alpha-helical hairpin fold  
20 stabilized with an intramolecular disulfide bridge suggests the existence of a new subclass of  
21 class IIb bacteriocins.

22

## 23 **IMPORTANCE**

24 *Streptococcus gallolyticus* subsp. *gallolyticus* (*SGG*), previously named *Streptococcus bovis*  
25 biotype I, is an opportunistic pathogen responsible for invasive infections (septicemia,  
26 endocarditis) in elderly people and often associated with asymptomatic colon tumors. *SGG*  
27 is one of the first bacteria to be associated with the occurrence of colorectal cancer in  
28 humans. Previously, we showed that tumor-associated conditions in the colon provide to  
29 *SGG* with the ideal environment to proliferate at the expense of phylogenetically and  
30 metabolically closely related commensal bacteria such as enterococci (Aymeric et al., 2017).  
31 *SGG* takes advantage of CRC-associated conditions to outcompete and substitute

32 commensal members of the gut microbiota using a specific bacteriocin named gallocin and  
33 renamed gallocin A recently following the discovery of gallocin D in a peculiar *SGG* isolate.  
34 Here, we showed that gallocin A is a two-peptide bacteriocin and that both GIIA1 and GIIA2  
35 peptides are required for antimicrobial activity. Gallocin A was shown to permeabilize  
36 bacterial membranes and to kill phylogenetically closely related bacteria such as most  
37 streptococci, lactococci and enterococci, probably through membrane pore formation. GIIA1  
38 and GIIA2 secreted peptides are unusually long (42 and 60 amino acids long) and with very  
39 few charged amino acids compared to well-known class IIb bacteriocins. *In silico* modelling  
40 revealed that both GIIA1 and GIIA2 exhibit a similar hairpin-like conformation stabilized by  
41 an intramolecular disulfide bond. We also showed that the GIP immunity peptide also forms  
42 a hairpin like structure like GIIA1/GIIA2. Thus, we hypothesize that GIP blocks the formation  
43 of the GIIA1/GIIA2 complex by interacting with GIIA1 or GIIA2. Gallocin A may constitute the  
44 first class IIb bacteriocin displaying disulfide bridges important for its structure and activity  
45 and the founding member of a subtype of class IIb bacteriocins.

## 1 INTRODUCTION

2

3 *Streptococcus gallolyticus* subsp. *gallolyticus* (*SGG*), formerly known as *S. bovis* biotype I, is a  
4 gut commensal of the rumen of herbivores causing infective endocarditis in elderly people  
5 and strongly associated with colorectal cancer (CRC). In a previous study, we have shown  
6 that *SGG* is able to take advantage of tumoral conditions (increased secondary bile salts  
7 concentration) to thrive and colonize the intestinal tract of Notch/APC mice. This  
8 colonization advantage was shown to be linked to the production of a two-component  
9 bacteriocin named gallocin enabling *SGG* to outcompete murine gut resident enterococci in  
10 tumor-bearing mice, but not in non-tumor mice (1). As such, gallocin constitutes the first  
11 bacterial factor explaining *SGG* association with CRC. Identification of a different gallocin,  
12 named gallocin D, from the environmental isolate *SGG* LL009 (2) led to renaming gallocin of  
13 *SGG* UCN34 as gallocin A.

14 Bacteriocins are highly diverse antimicrobial peptides secreted by nearly all bacteria. In  
15 gram-positive bacteria, they are divided in three classes based on size, amino acid  
16 composition and structure (3). Class I includes small (< 10-kDa), heat-stable peptides that  
17 undergo enzymatic modification during biosynthesis; class II includes small (< 10 kDa) heat-  
18 stable peptides without post-translational modifications; class III includes larger (> 10 kDa),  
19 thermo-labile peptides and proteins. Class II bacteriocins are further subdivided into four  
20 subtypes: class IIa consists of pediocin-like bacteriocins, class IIb consists of bacteriocins  
21 with two peptides, class IIc consists of leaderless bacteriocins, and class IId encompass all  
22 other non-pediocin-like, single peptide bacteriocins with a leader sequence. Previous *in*  
23 *silico* analysis revealed that gallocin A, encoded by *gallo\_2021* (renamed *gIIA2*) and  
24 *gallo\_2020* (renamed *gIIA1*), belong to the class IIb bacteriocins (Pfam10439) exhibiting a  
25 characteristic double glycine leader peptide. The third gene of this operon (*gallo\_2019*  
26 renamed *gip*) was thought to encode the immunity protein.

27 We previously showed that a secreted peptide, GSP, activates transcription of the gallocin A  
28 core operon through a two-component system named BpHR (4). The entire BpHR regulon  
29 has been characterized and consists of 24 genes, of which 20 belong to the gallocin locus  
30 (4). Concomitantly, we showed that GSP but also GIIA1 and GIIA2 are secreted by a unique  
31 ABC transporter named BpAB (5). GIIA1 and GIIA2 are synthesized as pre-peptides with an  
32 N-terminal leader sequence cleaved during export after a double glycine motif to produce

33 the extracellular mature active peptide. Well-known class IIb bacteriocins are usually  
34 constituted of two genes encoding short peptides, named alpha and beta, that fold into  
35 alpha-helical structures and insert into target bacterial membranes to alter their  
36 permeability, resulting in ion leakage and cell death (6).

37 The aim of the present work was to characterize the gallocin A activity spectrum, its  
38 mode of action and the immunity mechanism. Our results indicate that GIIA1 and GIIA2  
39 peptides are atypical and contain a disulfide bond required for antibacterial activity. We  
40 showed that GIIA1/GIIA2 can permeabilize lipid bilayers. The predicted structure of the GIP  
41 immunity peptide strikingly mimics that of the GIIA1 and GIIA2 mature peptides suggesting a  
42 mechanism of immunity by interference. *In vitro*, gallocin A was able to kill most closely  
43 related species such as streptococci and enterococci, highlighting the potential of these  
44 narrow-spectrum antimicrobials as alternatives to antibiotics.

1

## 2 **RESULTS**

3

### 4 **Gallocin A is a two-peptide bacteriocin**

5 As shown in Fig. 1A, the gallocin A core operon is composed of three genes (*gIIA2*, *gIIA1*, *gip*)  
6 coding for 2 putative bacteriocin peptides (GIIA1 and GIIA2) and a putative immunity protein  
7 (GIP). To demonstrate the role of *gIIA1* and *gIIA2* in gallocin A activity, we performed in-  
8 frame deletions of *gIIA1* and *gIIA2* separately in *SGG* strain UCN34 (wild-type, WT) and  
9 tested the antibacterial activity of the corresponding mutant supernatants by plate diffusion  
10 assays, as described previously (4). As shown in Fig. 1B, the antimicrobial activity of gallocin  
11 A is completely abolished in the supernatants of  $\Delta gIIA1$  and  $\Delta gIIA2$  mutants and restored  
12 when the supernatants of  $\Delta gIIA1$  and  $\Delta gIIA2$  are combined in a 1:1 ratio. This result  
13 demonstrates that both GIIA1 and GIIA2 are required for gallocin A activity and confirms  
14 that gallocin A is a two-peptide Class IIb bacteriocin (3). Finally, we showed that gallocin A is  
15 active in a wide range of pH (2-12, Fig. S1A) and temperature (Fig. S1B).

16 Since the gene encoding the putative immunity protein named GIP cannot be deleted alone  
17 without self-intoxication of the bacteria, we used the original mutant UCN34 $\Delta blp$  (1) in  
18 which the three genes of gallocin A operon (*gIIA2-gIIA1-gip*) were deleted and tested its  
19 sensitivity to gallocin A. As expected, the  $\Delta blp$  mutant became sensitive to gallocin A (Fig.  
20 1C). Next, we complemented the  $\Delta blp$  mutant with a plasmid encoding *gip* and showed that  
21 this was sufficient to restore bacterial growth of the recombinant strain in the presence of  
22 gallocin A. These results demonstrate that GIP confers immunity to gallocin A (Fig. 1C).  
23 Moreover, constitutive expression of *gip* in heterologous bacteria sensitive to gallocin (such  
24 as *Streptococcus agalactiae* and *Lactococcus lactis*) allowed their growth in the presence of  
25 gallocin (Fig. 1D). These results clearly demonstrate that expression of *gip* alone is necessary  
26 and sufficient to confer full immunity against gallocin A.

27

### 28 **Gallocin A is active against various streptococci and enterococci**

29 To further characterize the gallocin A activity spectrum, we tested the sensitivity of various  
30 bacteria from our laboratory collection, including species found as commensals in the gut as  
31 well as known gram-positive human pathogens. We showed that gallocin A is active only

32 against closely related bacteria, including various streptococci, enterococci, lactococci and  
33 inactive against all other gram-positive and gram-negative bacteria tested (Fig. 2, Fig. S2A).  
34 Interestingly, the three different *S. agalactiae* strains tested (NEM316, BM110, and A909)  
35 differed significantly in their susceptibility to gallocin A. Similarly, sensitivity to gallocin A of  
36 many *Enterococcus faecalis* clinical isolates, including a few vancomycin resistant isolates,  
37 was also variable (Fig. S2B). These results indicate that gallocin A sensitivity of a given  
38 species can vary from one strain to another.

39

#### 40 **Gallocin A induces target cell-membrane depolarization**

41 To test whether gallocin A peptides can alter cell membrane permeability, as shown for  
42 well-studied class IIb bacteriocins, we assessed its impact on target cell membrane potential  
43 using the fluorescent voltage-dependent dye DiBAC4(3) and propidium iodide (PI).  
44 DiBAC4(3) can access the cytoplasm only when the membrane is depolarized, thus  
45 indicating an ion imbalance, and the DNA intercalator PI can only enter bacterial cells when  
46 the cytoplasmic membrane is compromised. The entry of PI and DiBAC4(3) in cells exposed  
47 to supernatants from UCN34 WT,  $\Delta blp$  (no gallocin A) and  $\Delta blpS$  (a mutant previously shown  
48 to overproduce gallocin A, (4)) was assessed by flow cytometry. As shown in Fig. 3A and B,  
49 fluorescent dye penetration in *E. faecalis* OG1RF was increased in the presence of gallocin A  
50 as compared to the control supernatant without gallocin A, indicating that gallocin A  
51 peptides can form pores in bacterial membranes.

52 It was previously shown that pore formation by the two-peptide bacteriocins lactococcin G  
53 and enterocin 1071 requires the presence of UppP, a membrane protein involved in  
54 peptidoglycan synthesis that could serve as a receptor for these bacteriocins (7). To  
55 investigate whether gallocin A is active in the absence of a proteinaceous receptor, we  
56 tested its capacity to permeabilize lipid bilayer vesicles. To do so, we used large unilamellar  
57 vesicles (LUV) in which a fluorescence marker, the 8-Aminonaphthalene-1,3,6-Trisulfonic  
58 Acid (ANTS) and its quencher, p-Xylene-Bis-Pyridinium Bromide (DPX), are encapsulated. If  
59 pores are formed in the membrane of the liposomes, ANTS and DPX are released in the  
60 medium and ANTS recovers its fluorescence. As shown in Fig. 3C, addition of UCN34 WT  
61 supernatant containing gallocin A led to LUV permeabilization while the supernatant of the  
62  $\Delta blp$  mutant had no effect, showing that gallocin A can alter the vesicle membrane. Of note,  
63 addition of small amount of Tween 20 (0.01%) was necessary to observe gallocin A activity.

64 Importantly, the  $\Delta blp$  supernatant supplemented Tween20 at 0.01% had no effect on  
65 liposomes, showing that the membrane permeabilization induced by the UCN34 WT  
66 supernatant is not caused by the detergent alone (Fig. 3C).

67 We also confirmed that both GIIA1 and GIIA2 were required for membrane  
68 permeabilization. Indeed, addition of  $\Delta gIIA1$  or  $\Delta gIIA2$  supernatant alone had no effect,  
69 while addition of both supernatants led to LUV permeabilization, regardless of which  
70 peptide was added first (Fig. 3D).

71

### 72 **Gallocin A peptides contain a disulfide bond essential for their bactericidal activity**

73 Both GIIA1 and GIIA2 pre-peptides exhibit a typical N-terminal leader sequences of 23 amino  
74 acids, ending with two glycine residues, which is cleaved upon secretion of these peptides  
75 through a dedicated ABC transporter (5). GIIA1 and GIIA2 mature peptides each contain 2  
76 cysteines, which can potentially form a disulfide bridge important for their structure and  
77 function. Indeed, we showed that addition of reducing agents such as dithiothreitol (DTT) or  
78  $\beta$ -mercaptoethanol (data not shown) abolished gallocin A activity (Fig. 4A), whereas it has  
79 no effect on a control bacteriocin which does not possess a disulfide bond, such as nisin.  
80 Furthermore, LC/MS analysis provided the exact molecular masses of the mature GIIA1 and  
81 GIIA2 peptides. The calculated masses identified oxidized cysteine residues, indicating the  
82 presence of a disulfide bridge in each peptide (Fig. S3).

83 Interestingly, the gallocin A genomic locus in *SGG* UCN34 contains a conserved co-  
84 regulated gene (4), *gallo\_rs10370*, encoding a putative “bacteriocin biosynthesis protein”  
85 containing a thioredoxin domain (Fig. 4B). The thioredoxin domain is known to facilitate  
86 disulfide bond formation in *E. coli* (8) and is predicted to be extracellular by  
87 Pfam/Interproscan. We hypothesized that this gene renamed *blpT*, which encodes a surface  
88 protein potentially anchored to the cell-wall, could assist disulfide bond formation in  
89 gallocin A peptides following secretion and cleavage of the leader peptide by the ABC  
90 transporter BlpAB (5). Indeed, deletion of this gene in UCN34 ( $\Delta blpT$ ) strongly altered the  
91 ability of *SGG* to outcompete *Enterococcus faecalis* OG1RF in competition experiments  
92 where attacker *SGG* and prey *E. faecalis* were inoculated together in THY liquid medium at a  
93 1:1 ratio and counted on entero-agar plates after 4 h of co-culture at 37°C (Fig. 4C).  
94 Remarkably, the  $\Delta blpT$  mutant was comparable to the  $\Delta blp$  mutant and the back to the WT  
95 behaved like the parental UCN34 WT (Fig. 4C). Altogether these results indicate the



96 existence of disulfide bond in gallocin A mature peptides important for activity. Of note, the  
97 disulfide bond formation pathway of *E. coli*, containing the thioredoxin-like protein DsbA,  
98 was shown to be particularly important in anaerobic conditions (9). It is thus tempting to  
99 speculate that BlpT activity could be particularly important in the anaerobic environment  
100 that *SGG* encounter in the colon.

101

102

### 103 **The structural models of gallocin A peptides differ from those of other two-peptide** 104 **bacteriocins.**

105 Structural modelling of GIIA1 and GIIA2 pre- and mature forms was performed using  
106 ColabFold (10) and showed that the putative N-terminal leader sequences adopt disordered  
107 and extended conformations (Fig. 5A and B). The structural models of mature GIIA1 and  
108 GIIA2 are composed of two antiparallel alpha-helices, i.e. adopting an alpha-helical hairpin  
109 fold (Fig. 5A and B and Fig. S4A and B). Interestingly, the two cysteines of GIIA1 and GIIA2  
110 are facing one other in each alpha-helix of the helical hairpins, forming an intramolecular  
111 disulfide bond. This suggests that the disulfide bonds in GIIA1 and GIIA2 reduce the  
112 conformational flexibility within each alpha-helical hairpin and stabilize their three-  
113 dimensional structures. Interestingly, modelling of the immunity peptide GIP shows striking  
114 structural similarities with those of the mature GIIA1 and GIIA2 peptides (Fig. 6A and Fig.  
115 S4C). Despite a relative low confidence (IDDT between 50 and 65 %), the five structural  
116 models of GIIA1/GIIA2, GIIA1/GIP and GIIA2/GIP show similar orientations, giving credit to  
117 these models (Fig. 6B-D and Fig. S4D- F). As shown by aligning C $\alpha$  of each GIP in the  
118 GIIA1/GIP and GIIA2/GIP, we hypothesized that GIP could intercalate between GIIA1 and  
119 GIIA2 (Fig. 6E). Thus, GIP might provide immunity by preventing interaction between GIIA1  
120 and GIIA2 within the bacterial cell membrane of the producing bacteria.

121

### 122 **Mechanisms of resistance to gallocin A**

123 To better understand the mode of action of gallocin A, we decided to investigate the  
124 mechanisms of resistance to gallocin A. For that purpose, we isolated 14 spontaneous  
125 mutants (named RSM 1 to 14) of the highly sensitive strain *S. gallolyticus* subsp.  
126 *macedonicus* CIP 105683T on agar plates supplemented with gallocin A (see Materials and  
127 Methods for details). As shown in the supplemental Fig. S5B and C, 12 out of these 14

128 mutants were able to grow in liquid THY supplemented with gallocin A, in contrast to the  
129 parental strain *SGM* WT. However, when grown in presence of the control  $\Delta blp$  supernatant,  
130 which does not contain gallocin A, all the mutants exhibited a longer latency phase than the  
131 parental *SGM* WT, suggesting that the acquired mutations may have a fitness cost.

132 To identify the mutations conferring resistance to gallocin A in these mutants, whole-  
133 genome sequencing was performed using Illumina technology and compared with the  
134 genome of the parental strain that was *de novo* assembled using PacBio sequencing.  
135 Between 1 and 8 single nucleotide polymorphism (SNP)/deletion/insertion were identified  
136 in each RSM mutant when compared to the WT controls (Table 1). Seven out of twelve  
137 mutants (RSM1, RSM2, RSM4, RSM5, RSM6, RSM12, RSM14) had mutations in the genes  
138 encoding the WalKR two-component system (TCS) and 3 others (RSM 7, RSM 8 and RSM10)  
139 had mutations in a gene (homologous to *gallo\_rs1495*) encoding a putative “aggregation  
140 promoting factor” which contain a LysM peptidoglycan-binding domain and a lysozyme-like  
141 domain (Table 1, Fig. S6). The 2 remaining mutants (RSM3 and RSM11) displayed mutations  
142 which were not present in the other mutants and located in other genes.

143 The WalRK TCS is known as the master regulator of cell wall homeostasis, cell membrane  
144 integrity, and cell division processes in gram-positive bacteria (11). In streptococci, response  
145 regulator WalR (VicR) but not the histidine kinase WalK (VicK) is essential. Consistent with  
146 this, the 2 mutations observed in WalR were single amino acid substitutions (RSM6 Ala<sub>95</sub> to  
147 Val; RSM12 Arg<sub>117</sub> to Cys) while 4 out of the 5 mutations in WalK led to a frameshift or the  
148 appearance of a STOP codon (Fig. S6).

149 Interestingly, three other mutants (RSM7, RSM8 and RSM10) mapped in a single gene  
150 encoding a putative cell-wall binding protein with a C-terminal lysozyme-like domain. Two  
151 mutants (RSM7 and RSM8) exhibited frameshift mutations leading to the appearance of a  
152 premature STOP codon, and the last one (RSM10) a substitution of the putative key catalytic  
153 residue of the lysozyme-like domain (E<sub>137</sub> to K, Fig. S6).

154 Thus, we hypothesized that peptidoglycan alterations in these mutant strains could explain  
155 the resistance to gallocin A. To test this hypothesis, we labelled peptidoglycan with the  
156 fluorescent lectin Wheat Germ Agglutinin (WGA-488) and imaged the mutants with  
157 conventional fluorescence microscopy. As shown in Fig. 7, most gallocin A resistant mutants,  
158 including all WalKR mutants, exhibit abnormal morphology and formed small aggregates as  
159 compared to the typical *SGM* WT linear chain of 2-5 cells. Cell morphology defects and

160 peptidoglycan alterations were also detected in the 2 mutants which do not share common  
161 mutations with the other mutants (RSM 3 and 13, Fig. 7).

162 Taken together, these results suggest that alteration of the peptidoglycan structure could  
163 lead to gallocin A resistance, either by blocking its access to the membrane or by the  
164 formation of cell aggregates. It is worth noting that RSM mutants' resistance to gallocin A  
165 was intermediate and that no potential membrane receptor for gallocin A peptides was  
166 identified.

## 1 DISCUSSION

2  
3 Gallocin A is a class IIb bacteriocin secreted by *Streptococcus gallolyticus* subsp.  
4 *gallolyticus* (SGG) to outcompete indigenous gut *Enterococcus faecalis* (EF) in tumoral  
5 conditions only (1). Mechanistically, gallocin A activity was found to be enhanced by higher  
6 concentrations of secondary bile acids found in tumoral conditions (1). Another proof-of-  
7 concept study showed that EF carrying the conjugative plasmid pPD1 expressing bacteriocin  
8 was able to replace indigenous enterococci lacking pPD1 (11). The rise of antimicrobial  
9 resistance combined with the recognized roles in health of gut microbiota homeostasis has  
10 attracted a renewed interest in the role of bacteriocins in gut colonization and their use as  
11 potential tools for editing and shaping the gut microbiome (12).

12  
13 We show here that gallocin A, like many class IIb bacteriocins, only kills closely  
14 related species belonging to the Streptococcaceae and Enterococcaceae family.  
15 Interestingly, gallocin A can kill *Enterococcus faecium*, a commensal bacterium contributing  
16 largely to the transfer of antibiotic resistance in the microbiome and classified as high  
17 priority in the “WHO priority pathogens list for R&D of new antibiotics”. Taken together,  
18 these results highlight the potential of using bacteriocins such as gallocin A to fight  
19 antibiotic resistance and to cure bacterial infections with a lower impact on the gut  
20 microbiota due to their narrow spectrum of action.

21  
22 Both GIIA1 and GIIA2 are synthesized as pre-peptides with an N-terminal leader  
23 sequence which is cleaved during export after a GG motif via a specific ABC transporter,  
24 BlpAB, to produce the extracellular mature active peptides (5). Experimental determination  
25 of the molecular mass of GIIA1 and GIIA2 by LC/MS fits with a cleavage after the GG motif  
26 present in the leader sequence and indicates the presence of an intramolecular disulfide  
27 bond in GIIA1 and GIIA2. Moreover, reduction of these disulfide bonds abrogates gallocin A  
28 antimicrobial activity. ColabFold modeling of GIIA1 and GIIA2 indicates that the N-terminal  
29 leader sequence is unstructured and that the mature GIIA1 and GIIA2 share a similar  
30 structural fold with two antiparallel  $\alpha$ -helices forming a hairpin stabilized by an  
31 intramolecular disulfide bond. To our knowledge, this is the first report of an intramolecular  
32 disulfide bond in class IIb bacteriocin peptides. Most class IIb peptides, including the well

33 described lactococcin G, the plantaricin EF, the plantaricin JK and the carnobacteriocin XY  
34 (CbnXY) (13–16), do not contain cysteine residues in their primary amino acid sequences.  
35 Consistently, the peptides constituting these 4 well-known bacteriocins are composed of  
36 only one main alpha-helix, and therefore do not require any disulfide bond to stabilize their  
37 tri-dimensional structures. Recently, gallocin D was identified in a very peculiar strain SGG  
38 LL009, isolated from raw goat milk in New Zealand (2). Gallocin D is a two-peptide  
39 bacteriocin homologous to infantaricin A secreted by *Streptococcus infantarius*, a member  
40 of the *Streptococcus bovis* group (2). Of note, the peptides of the 4 well described two-  
41 peptide bacteriocins discussed above and of gallocin D are much smaller in size (about 30  
42 amino acids long) than the gallocin A peptides (2). In addition, gallocin A peptides are less  
43 positively charged (1 positively charged amino acid in GIIA1, 2 in GIIA2), while the highly  
44 positively charged C-terminus of lactococcin G  $\alpha$ -peptide is thought to contribute to the  
45 anchoring of the peptide to the membrane, thanks to the transmembrane potential  
46 (negative inside) (13, 17).

47 A few other class IIb bacteriocins, such as brochocin C, thermophilin 13 and ABP-118  
48 (18–21), were found to share similar structural properties with gallocin A peptides (longer  
49 peptides, few positively charged amino acids and two cysteine residues in each peptide  
50 located close to N-/C-terminus). Alphafold modelling of these peptides showed that their  
51 putative structures resemble those of GIIA1 and GIIA2, with two-antiparallel alpha-helices.  
52 Disulfide bonds between the cysteines of the 2 helices were also predicted in 5 out of the 6  
53 peptides (Fig. S7). BrcB, the peptide without predicted disulfide bond, was also the one with  
54 the worse IDDT score, suggesting that the prediction might not be accurate. In conclusion,  
55 gallocin A, as well as other class IIb bacteriocins such as brochocin C, thermophilin 13 and  
56 ABP-118, might represent a subgroup in class IIb bacteriocins which differs in structure, and  
57 potentially in their mode of action from the other well-known class IIb bacteriocins.

58

59 Finally, gallocin A resistance was studied through whole-genome sequencing of 12  
60 spontaneous resistant mutants derived from the highly sensitive strain *S. gallolyticus* subsp.  
61 *macedonicus* CIP105683T. Previously, this method allowed the identification of UppP as a  
62 membrane receptor required for lactococcin G activity (7). Unlike this previous study, we did  
63 not find a common gene mutated in our 12 resistant mutants (RSM), suggesting that gallocin  
64 A does not require the presence of a specific receptor. This is in agreement with our data

65 showing that gallocin A can permeabilize lipid vesicles composed of two phospholipids  
66 (phosphatidylcholine and phosphatidylglycerol). The majority of RSM mutants exhibited  
67 mutations in the genes encoding a regulatory two-component system sharing strong  
68 homologies with WalkR (also known as VicKR and YycGF). This two-component system,  
69 originally identified in *Bacillus subtilis*, is very highly conserved and specific to low GC%  
70 Gram-positive bacteria, including several pathogens such as *Staphylococcus aureus* (22, 23).  
71 Several studies have unveiled a conserved function for this system in different bacteria,  
72 including several streptococcal pathogens, defining this signal transduction pathway as a  
73 master regulatory system for cell wall metabolism (23). Consistent with the potential defect  
74 in cell-wall synthesis, these mutants showed morphological abnormalities and cell-division  
75 defects. Similar observations have been reported in *Staphylococcus aureus* (24–26) where  
76 mutations in *walk* were shown to confer intermediate resistance to vancomycin and  
77 daptomycin.

78 Three mutants displayed independent mutations in a small protein (197 amino acids)  
79 of unknown function containing an N-terminus LysM-peptidoglycan binding domain and a C-  
80 terminus lysozyme-like domain. The lysozyme-like domain, which is about fifty amino acids  
81 long, was originally identified in enzymes that degrade the bacterial cell-walls. Interestingly,  
82 the mutations in RSM7, RSM8, RSM10 mutant all mapped within the lysozyme-like domain,  
83 suggesting a potential alteration of the cell-wall in these mutants. Finally, the last two last  
84 mutants (RSM3 and RSM13) carrying mutations in other genes than in *walRK* exhibited the  
85 same morphology defects associated with gallocin A resistance.

86 To conclude, it is worth highlighting that the 12 mutants were only partially resistant  
87 to gallocin A. Most RSM mutants form bacterial aggregates which probably contributes to  
88 their resistance to gallocin A, just as biofilms are more resistant to antibiotics. No specific  
89 membrane receptor could be identified for gallocin A. Interestingly, it has also been  
90 suggested that thermophilin 13, another class IIb bacteriocin that shares putative structural  
91 similarity with gallocin A (18), does not require any specific receptor for its activity.  
92 However, the different level of susceptibility to gallocin A within a given species, as  
93 demonstrated for three Group B *Streptococcus* strains (A909 > BM110 > NEM316), as well as  
94 its narrow-spectrum mode of action indicate that unidentified bacterial factors can  
95 modulate gallocin A sensitivity. It will also be important in the future to identify the direct

96 bacterial targets of gallocin A in the murine colon using global 16S DNA sequencing in  
97 normal and tumoral conditions.

## 1 MATERIALS AND METHODS

2

### 3 Cultures, bacterial strains, plasmids and oligonucleotides

4 *Streptococci* and *Enterococci* used in this study were grown at 37°C in Todd-Hewitt broth  
5 supplemented with 0.5% yeast extract (THY) in standing filled flasks. When appropriate, 10  
6 µg/mL of erythromycin were added for plasmid maintenance.

7 Plasmid construction was performed by: PCR amplification of the fragment to insert in the  
8 plasmid with Q5® High-Fidelity DNA Polymerase (New England Biolabs), digestion with the  
9 appropriate FastDigest restriction enzymes (ThermoFisher), ligation with T4 DNA ligase  
10 (New England Biolabs) and transformation in commercially available TOP10 competent *E.*  
11 *coli* (ThermoFisher). *E. coli* transformants were cultured in Miller's LB supplemented with  
12 150 µg/mL erythromycin (for pG1- derived plasmids) or 50 µg/mL kanamycin (pTCV- derived  
13 plasmid). Verified plasmids were electroporated in *S. agalactiae* NEM316 and mobilized  
14 from NEM316 to *SGG* UCN34 by conjugation as described previously (27). pTCV-derived  
15 plasmids were electroporated in *Lactococcus lactis* NZ9000. Strains, plasmids and primers  
16 used in this study are listed in Table 1. The wide range of bacteria tested *in vitro* for their  
17 resistance or sensitivity to gallocin A antimicrobial activity come from our laboratory  
18 repository and were cultured in their optimal media and conditions.

19

### 20 Construction of markerless deletion mutants in *SGG* UCN34

21 In-frame deletion mutants were constructed as described previously (27). Briefly, the 5' and  
22 3' region flanking the region to delete were amplified and assembled by splicing by overlap  
23 extension PCR and cloned into the thermosensitive shuttle vector pG1. Once transformed in  
24 UCN34, the cells were cultured at 38°C with erythromycin to select for the chromosomal  
25 integration of the plasmid by homologous recombination. About 4 single cross-over  
26 integrants were serially passaged at 30 °C without antibiotic to facilitate the second event of  
27 homologous recombination and excision of the plasmid resulting either in gene deletion or  
28 back to the WT (bWT). In-frame deletions were identified by PCR and confirmed by DNA  
29 sequencing of the chromosomal DNA flanking the deletion.

30

### 31 Gallocin A production assays



32 Briefly, one colony of the indicator strain, here *Streptococcus gallolyticus subsp.*  
33 *macedonicus* (SGM), was resuspended in 2 mL THY, grown until exponential phase, poured  
34 on a THY agar plate, the excess liquid was removed and left to dry under the hood for about  
35 20 min. Using sterile tips, 5-mm-diameter wells were dug into the agar. Each well was then  
36 filled with 80  $\mu$ L of filtered supernatant from 5 h cultures (stationary phase) of SGG UCN34  
37 WT or otherwise isogenic mutant strains and supplemented with Tween 20 at 0.1% final  
38 concentration. Inhibition rings around the wells were observed the following morning after  
39 overnight incubation at 37°C.

40

#### 41 **Competition experiments**

42 SGG strains were inoculated from fresh agar plate at initial DO<sub>600</sub> of 0.1 together with *E.*  
43 *faecalis* OG1RF in THY medium and incubated for 4 h at 37°C in micro aerobiosis. After 4 h of  
44 co-culture, the mixed cultures were serially diluted and plated on Enterococcus agar-  
45 selective plates (BD Difco). On these plates, SGG exhibits a pale pink color while *E. faecalis*  
46 exhibits a strong purple color. CFU were counted the next morning to determine the final  
47 concentration in CFU/mL in each test sample.

48

#### 49 **Analysis of gallocin A peptides by LC-MS**

50 *Sgg* UCN34 was grown in 500 mL of sterile THY supplemented with 5 nM synthetic GSP at  
51 37 °C with 5% CO<sub>2</sub> for 12-16 h. The cultures were centrifuged at 4,000 x g for 20 min and the  
52 supernatant was filtered through a sterile 0.22  $\mu$ m polyethersulfone (PES) filter. Ammonium  
53 sulfate was added to the filtered supernatants to give a 20% (wt/vol) concentration and  
54 mixed by inversion until all ammonium sulfate salts went into solution. The solution was  
55 stored at 4 °C for 1 h, followed by centrifugation at 4,000 x g for 20 min. The supernatants  
56 were discarded, and the remaining pellet was dissolved in 100 mL DI water and placed in a 3  
57 kDa MWCO dialysis tube. The dialysis tube was placed in a 500 mL graduated cylinder  
58 containing distilled water and a stir bar. Dialysis was performed for 4 h with changing of DI  
59 water every hour. The material in the dialysis tube was then lyophilized. A 5 mg/mL solution  
60 of the lyophilized material was prepared in 75:25 (H<sub>2</sub>O:ACN) and 50  $\mu$ L were injected into an  
61 Agilent Technologies 6230 time of flight mass spectrometer (an HRMS system) with the  
62 following settings for positive electrospray ionization (ESI+) mode: capillary voltage = 3,500  
63 V; fragmentor voltage = 175 V; skimmer voltage = 65 V; Oct 1 RF Vpp = 750 V; gas

64 temperature = 325 °C; drying gas flow rate = 0.7 L/min; nebulizer; 25 lb/in<sup>2</sup>; acquisition time  
65 = 17.5 min. An XBridge C18 column (5 μm, 4.6 x 150 mm) was used for the LC-MS analysis.

66

### 67 **Membrane permeabilization assays**

68 These assays were performed as described previously (28). Briefly, ANTS (fluorophore  
69 probe) and DPX (quencher) were encapsulated into large unilamellar vesicles (LUVs) to  
70 monitor membrane permeabilization induced by peptides. The LUVs were prepared at a  
71 concentration of 10 mM lipid at a POPC:POPG molar ratio of 8:2 containing 20 mM ANTS  
72 and 60 mM DPX. The multilamellar vesicle suspension was extruded through 0.4- and 0.2-  
73 μm polycarbonate filters to produce LUVs of 200 ± 30 nm in diameter, as measured by DLS.  
74 The unencapsulated ANTS and DPX were removed by gel filtration through a Sephadex G-25  
75 column 5 mL (Cytiva, USA). For permeabilization assays, LUVs were incubated in buffer at  
76 0.45 mM lipids at 25 °C in a 101-QS cuvette (Hellma, France) and under constant stirring.  
77 The excitation wavelength was set to 390 nm and the emission of ANTS was continuously  
78 measured at 515 nm. The maximum intensity of permeabilization, corresponding to the  
79 maximum recovery of ANTS fluorescence was measured after addition of 0.12% (2 mM) of  
80 Triton X100.

81

### 82 **Generation of galloicin resistant mutants**

83 In order to generate galloicin resistant mutants, we concentrated *SGG* supernatant 200  
84 times by precipitation with 20% of ammonium sulfate. By serial 2-fold dilutions, we showed  
85 that this supernatant was approximately 64 times more concentrated than the original  
86 supernatant (Fig. S5A). Fourteen resistant mutants (named RSM1 to 14) of *S. gallolyticus*  
87 *subsp. macedonicus* parental strain CIP105683T, the species showing the highest sensitivity  
88 to galloicin A, were selected on THY agar plates containing 10% of this concentrated  
89 supernatant. Twelve of them were confirmed to be galloicin resistant by growth in THY  
90 supplemented with the supernatant of *SGG* WT, containing galloicin, and 0.01% of Tween20,  
91 which is necessary for galloicin A activity (Fig. S4B and C). As an important control, the same  
92 experiment was performed after precipitation of the *Δblp* supernatant that does not  
93 produce galloicin A. *SGM* WT was re-isolated on this plate and a single colony was stocked  
94 and sequenced with the RSM mutants as described below.

95

96 **Sequencing and SNP localization**

97 Whole-genome sequencing of the control *SGM* WT, re-isolated from  $\Delta blp$  plate as described  
98 in the section above, and of RSM mutants was performed using Illumina technology and  
99 compared with the genome of the parental strain *SGM* CIP105683T that was *de novo*  
100 assembled using PacBio sequencing. The assembly was performed with Canu 1.6. (29)  
101 leading to a main chromosome of 2,210,410bp and a plasmid of 12729bp (HE613570.1). The  
102 annotation was subsequently made with Prokka (30) before a variant calling was performed  
103 using the Sequana (31) variant calling pipeline. Of note, variants were called with a  
104 minimum frequency of 10% and a minimum strand balance of 0.2. Many mutations,  
105 probably due to the different method used for the sequencing of the reference sequence,  
106 were present in the control *SGM* WT strain used as control and the RSM mutants.  
107 Therefore, only RSM specific mutations occurring at a frequency >0.5 as compared to control  
108 *SGM* WT were taken into account for this analysis and are shown in Table 2.

## ACKNOWLEDGEMENTS

We would like to thank particularly Tarek Msadek for careful and critical reading of the manuscript. This study has been funded by the Institut National contre le Cancer (INCA) PLBIO 16-025 attributed to S. Dramsi and from the French Government's Investissement d'Avenir program, Laboratoire d'Excellence "Integrative Biology of Emerging Infectious Diseases (grant n° ANR-10-LABX-62-IBEID). This study was also funded by the National Science Foundation (NSF, CHE-1808370, to Y.T).

## REFERENCES

1. Aymeric L, Donnadieu F, Mulet C, du Merle L, Nigro G, Saffarian A, Bérard M, Poyart C, Robine S, Regnault B, Trieu-Cuot P, Sansonetti PJ, Dramsi S. 2018. Colorectal cancer specific conditions promote *Streptococcus gallolyticus* gut colonization. *Proc Natl Acad Sci U S A* 115:E283–E291.
2. Hill D, O'Connor PM, Altermann E, Day L, Hill C, Stanton C, Ross RP. 2020. Extensive bacteriocin gene shuffling in the *Streptococcus bovis*/*Streptococcus equinus* complex reveals gallocin D with activity against vancomycin resistant enterococci. *Sci Rep* 10:13431.
3. Alvarez-Sieiro P, Montalbán-López M, Mu D, Kuipers OP. 2016. Bacteriocins of lactic acid bacteria: extending the family. *Appl Microbiol Biotechnol* 100:2939–2951.
4. Proutière A, du Merle L, Périchon B, Varet H, Gominet M, Trieu-Cuot P, Dramsi S. 2021. Characterization of a Four-Component Regulatory System Controlling Bacteriocin Production in *Streptococcus gallolyticus*. *mBio* 12:e03187-20.
5. Harrington A, Proutière A, Mull RW, du Merle L, Dramsi S, Tal-Gan Y. 2021. Secretion, Maturation, and Activity of a Quorum Sensing Peptide (GSP) Inducing Bacteriocin Transcription in *Streptococcus gallolyticus*. *mBio* 12:e03189-20.
6. Oppegård C, Rogne P, Emanuelsen L, Kristiansen PE, Fimland G, Nissen-Meyer J. 2007. The Two-Peptide Class II Bacteriocins: Structure, Production, and Mode of Action. *J Mol Microbiol Biotechnol* 13:210–219.
7. Kjos M, Oppegård C, Diep DB, Nes IF, Veening J-W, Nissen-Meyer J, Kristensen T. 2014. Sensitivity to the two-peptide bacteriocin lactococcin G is dependent on UppP, an enzyme involved in cell-wall synthesis. *Mol Microbiol* 92:1177–1187.
8. Landeta C, Boyd D, Beckwith J. 2018. Disulfide bond formation in prokaryotes. *Nat Microbiol* 3:270–280.
9. Meehan BM, Landeta C, Boyd D, Beckwith J. 2017. The Disulfide Bond Formation Pathway Is Essential for Anaerobic Growth of *Escherichia coli*. *J Bacteriol* 199:e00120-17.
10. Mirdita M, Schütze K, Moriwaki Y, Heo L, Ovchinnikov S, Steinegger M. 2022. ColabFold: making protein folding accessible to all. *Nat Methods* 19:679–682.

11. Kommineni S, Bretl DJ, Lam V, Chakraborty R, Hayward M, Simpson P, Cao Y, Bousounis P, Kristich CJ, Salzman NH. 2015. Bacteriocin production augments niche competition by enterococci in the mammalian gastrointestinal tract. *Nature* 526:719–722.
12. Heilbronner S, Krismer B, Brötz-Oesterhelt H, Peschel A. 2021. The microbiome-shaping roles of bacteriocins. *Nat Rev Microbiol* 19:726–739.
13. Rogne P, Fimland G, Nissen-Meyer J, Kristiansen PE. 2008. Three-dimensional structure of the two peptides that constitute the two-peptide bacteriocin lactococcin G. *Biochim Biophys Acta* 1784:543–554.
14. Rogne P, Haugen C, Fimland G, Nissen-Meyer J, Kristiansen PE. 2009. Three-dimensional structure of the two-peptide bacteriocin plantaricin JK. *Peptides* 30:1613–1621.
15. Fimland N, Rogne P, Fimland G, Nissen-Meyer J, Kristiansen PE. 2008. Three-dimensional structure of the two peptides that constitute the two-peptide bacteriocin plantaricin EF. *Biochim Biophys Acta* 1784:1711–1719.
16. Acedo JZ, Towle KM, Lohans CT, Miskolzie M, McKay RT, Doerksen TA, Vederas JC, Martin-Visscher LA. 2017. Identification and three-dimensional structure of carnobacteriocin XY, a class IIb bacteriocin produced by *Carnobacteria*. *FEBS Lett* 591:1349–1359.
17. Nissen-Meyer J, Oppegård C, Rogne P, Haugen HS, Kristiansen PE. 2010. Structure and Mode-of-Action of the Two-Peptide (Class-IIb) Bacteriocins. *Probiotics Antimicrob Proteins* 2:52–60.
18. Marciset O, Jeronimus-Stratingh MC, Mollet B, Poolman B. 1997. Thermophilin 13, a Nontypical Antilisterial Poration Complex Bacteriocin, That Functions without a Receptor\*. *J Biol Chem* 272:14277–14284.
19. Flynn S, van Sinderen D, Thornton GM, Holo H, Nes IF, Collins JK. 2002. Characterization of the genetic locus responsible for the production of ABP-118, a novel bacteriocin produced by the probiotic bacterium *Lactobacillus salivarius* subsp. *salivarius* UCC118. *Microbiol Read Engl* 148:973–984.
20. Garneau S, Ference CA, van Belkum MJ, Stiles ME, Vederas JC. 2003. Purification and characterization of brochocin A and brochocin B(10-43), a functional fragment generated by heterologous expression in *Carnobacterium piscicola*. *Appl Environ Microbiol* 69:1352–1358.
21. Siragusa GR, Cutter CN. 1993. Brochocin-C, a new bacteriocin produced by *Brochothrix campestris*. *Appl Environ Microbiol* 59:2326–2328.

22. Dubrac S, Boneca IG, Poupel O, Msadek T. 2007. New Insights into the Walk/WalR (YycG/YycF) Essential Signal Transduction Pathway Reveal a Major Role in Controlling Cell Wall Metabolism and Biofilm Formation in *Staphylococcus aureus*. *J Bacteriol* 189:8257–8269.
23. Dubrac S, Bisicchia P, Devine KM, Msadek T. 2008. A matter of life and death: cell wall homeostasis and the WalkR (YycGF) essential signal transduction pathway. *Mol Microbiol* 70:1307–1322.
24. Hu J, Zhang X, Liu X, Chen C, Sun B. 2015. Mechanism of reduced vancomycin susceptibility conferred by walk mutation in community-acquired methicillin-resistant *Staphylococcus aureus* strain MW2. *Antimicrob Agents Chemother* 59:1352–1355.
25. Peng H, Hu Q, Shang W, Yuan J, Zhang X, Liu H, Zheng Y, Hu Z, Yang Y, Tan L, Li S, Hu X, Li M, Rao X. 2017. Walk(S221P), a naturally occurring mutation, confers vancomycin resistance in VISA strain XN108. *J Antimicrob Chemother* 72:1006–1013.
26. Yin Y, Chen H, Li S, Gao H, Sun S, Li H, Wang R, Jin L, Liu Y, Wang H. 2019. Daptomycin resistance in methicillin-resistant *Staphylococcus aureus* is conferred by IS256 insertion in the promoter of mprF along with mutations in mprF and walk. *Int J Antimicrob Agents* 54:673–680.
27. Danne C, Guérillot R, Glaser P, Trieu-Cuot P, Dramsi S. 2013. Construction of isogenic mutants in *Streptococcus gallolyticus* based on the development of new mobilizable vectors. *Res Microbiol* 164:973–978.
28. Voegele A, Sadi M, O'Brien DP, Gehan P, Raoux-Barbot D, Davi M, Hoos S, Brûlé S, Raynal B, Weber P, Mechaly A, Haouz A, Rodriguez N, Vachette P, Durand D, Brier S, Ladant D, Chenal A. 2021. A High-Affinity Calmodulin-Binding Site in the CyaA Toxin Translocation Domain is Essential for Invasion of Eukaryotic Cells. *Adv Sci Weinh Baden-Wurttemberg* 8:2003630.
29. Koren S, Walenz BP, Berlin K, Miller JR, Bergman NH, Phillippy AM. 2017. Canu: scalable and accurate long-read assembly via adaptive k-mer weighting and repeat separation. *Genome Res* 27:722–736.
30. Seemann T. 2014. Prokka: rapid prokaryotic genome annotation. *Bioinforma Oxf Engl* 30:2068–2069.
31. Cokelaer T, Desvillechabrol D, Legendre R, Cardon M. 2017. “Sequana”: a Set of Snakemake NGS pipelines. *J Open Source Softw* 2:352.

## FIGURE LEGENDS

### **Fig. 1. Gallocin A is a two-peptide bacteriocin.**

**A)** The core operon encoding gallocin A peptides and the immunity protein in *SGG* strain UCN34. Gallocin genes are indicated in red and renamed *gIIA1* and *gIIA2* according to (2). **B)** Agar diffusion assay to test gallocin activity from supernatants of UCN34 WT,  $\Delta gIIA1$ ,  $\Delta gIIA2$  et  $\Delta blp$  against gallocin-sensitive *S. gallolyticus subsp. macedonicus* (*SGM*) strain. **C)** and **D)** Growth curves of *SGG*  $\Delta blp$ , *S. agalactiae* A909 and *L. lactis* NZ9000 containing an empty plasmid (p) or a plasmid expressing *gip* (p-*gip*) in THY supplemented with supernatant of  $\Delta blpS$  (a strain overproducing gallocin, “+gallocin”) or  $\Delta blp$  (gallocin deletion mutant, “-gallocin”) and 0.01% of tween 20.

### **Fig. 2. Gallocin A is active against most streptococci, lactococci and enterococci.**

Phylogenetic tree based on the 16S RNA sequence (from the Silva online database) of different bacterial species that are resistant (in red) or sensitive (in green) to gallocin, as determined by agar diffusion assay (Fig. S2).

### **Fig. 3. Gallocin A can permeabilize bacterial membranes and lipid vesicles.**

Fluorescence of the voltage-sensitive DiBac4(3) (**A**) or the membrane impermeant propidium iodide PI (**B**) after resuspension of *Enterococcus faecalis* OG1RF in supernatant of UCN34 WT,  $\Delta blp$  (-gallocin) and  $\Delta blpS$  (overexpressing gallocin). **C-D)** Measure of the fluorescence corresponding to the release of ANTS (ex: 390nm, em: 515nm) encapsulated in large unilamellar vesicles after addition of *SGG* supernatant or Triton X-100 (positive control). **C:** At 60 s, Triton or the supernatant of *SGG* UCN34 WT, or  $\Delta blp$ , or WT 30X (concentrated 30 times) or  $\Delta blp$  30X, were added to the liposomes. **D:** At 60 s (SN1), the supernatant of  $\Delta gIIA1$  or  $\Delta gIIA2$  was added to the lipid vesicle suspension. At 200 s (SN2), the supernatant of the other strain is added. AU: Arbitrary Unit.

### **Fig. 4. Gallocin A peptides possess a disulfide bridge important for structure and activity.**

**A)** Agar diffusion assay to test gallocin activity from supernatants of *SGG* WT or  $\Delta blpS$  supplemented or not with 50mM of DTT **B)** Schematic representation of the gallocin



genomic locus and pBLAST domain identification in BlpT protein. **C)** Recovered *E. faecalis* after co-culture at 1:1 ratio for 4 h with *SGG* WT,  $\Delta blp$ ,  $\Delta blpT$  and WT revertant from *blpT* deletion.

**Fig. 5. Structural models of GIIA1 and GIIA2 predicted using ColabFold.** Pro- and mature forms of GIIA1 (A) and GIIA2 (B) using ColabFold and visualization was obtained with PyMOL (version 2.5.2 The PyMOL Molecular Graphics System, Version 2.0 Schrödinger, LLC).

All representations are colored with predicted IDDT from a score of 30% (red) to 100% (blue). For the pro-GIIA1 and pro-GIIA2, glycine doublet is colored in green. The disulfide bridges are represented in stick.

**Fig. 6. Structural models of GIP and its interactions with GIIA1, GIIA2.** **A)** ColabFold modelling of GIP and visualization with PyMOL. **B, C, D)** ColabFold modelling of the interaction between GIIA1/GIIA2 (**B**), GIP/GIIA1 (**C**), GIP/GIIA2 (**D**), and GIIA1/GIP/GIIA2 (**E**) interaction models aligned on the C $\alpha$  of each GIP.

**Fig. 7. Gallocin A-resistant mutants (RSM) forms aggregates and exhibit morphological defects as compared to the parental gallocin A-sensitive strain SGM.**

Epifluorescence microscopy images of *SGM* WT and RSM 1 to 12 labelled with the Wheat Germ Agglutinin-488, a fluorescent peptidoglycan dye.

## SUPPLEMENTARY FIGURE LEGENDS

### **Fig. S1. Gallocin A is active in a broad range of pH and heat-stable**

**A)** Agar diffusion assay to test gallocin activity from supernatants of UCN34 WT and  $\Delta blp$  at different pH against *SGM*, a gallocin A-sensitive bacterium. The initial supernatant from an overnight culture (left well) had a pH of 5.4. pH was then adjusted to 2-12 using HCl or NaOH. **B)** Supernatant was heated at 80°C for indicated times and tested as in (A).

### **Figure S2: Gallocin A spectrum of action**

Agar diffusion assay using UCN34 WT and  $\Delta blp$  supernatant against various bacterial species.

### **Fig. S3: LC-MS analysis of the two components comprising gallocin A indicating that both peptides contain a disulfide bridge.**

Left Panel: Top – GIIA2 structure, molecular formula and molecular weight (with disulfide bridge); Middle – Mass Spectrum showing the  $MH_3^{+3}/3$  and  $MH_4^{+4}/4$  masses observed for GIIA2; Bottom – LC chromatogram showing the peak where GIIA2 was detected. Right Panel: Top – GIIA1 structure, molecular formula and molecular weight (with disulfide bridge); Middle – Mass Spectrum showing the  $MH_2^{+2}/2$  and  $MH_3^{+3}/3$  masses observed for GIIA1; Bottom – LC chromatogram showing the peak where GIIA1 was detected.

**Fig. S4: Structural models of GIIA1, GIIA2 and GIP alone or in complex with each other.** All representations are colored with predicted IDDT from a score of 30% (red) to 100% (blue). The disulfide bond is visible in stick representation for GIIA1 and GIIA2.

### **Fig. S5: Obtention of 12 spontaneous mutants (RSM) resistant to gallocin A as compared to the parental sensitive strain *SGM*.**

**A)** Agar diffusion assay against *S. macedonicus* using serial two-fold dilutions of *Sgg* supernatant concentrated (SN 200X) or not (SN 1X) by ammonium sulfate precipitation. **B)** and **C)** Growth curves for the 12 gallocin A- resistant mutants in the presence or absence of gallocin A (THY medium supplemented with 30% of *SGG* WT/ $\Delta blp$  supernatant)

**Fig. S6: Amino acid changes in Walk, WalR or Aggregation Promoting Factor (APF) in RSM mutants as compared to the parental SGM (WT)**

Comparison of the primary amino acid sequence of Walk (A), WalR (B), and the aggregation promoting factor (C) found in RSM mutants to their WT counterpart. Putative domains of these proteins, identified by BLAST, are shown in red (HATPase\_C: [smart00387](#) ; REC: [cd17614](#) ; Helix-turn-helix: [pfam00486](#) ; LysM: [cd00118](#) and Lysozyme-like: [cd13925](#)). Putative residues important for the protein activity, identified by BLAST, are indicated by a dark arrowhead.

**Fig. S7: Putative structure of two-component bacteriocins**

Structural models of mature forms of the two peptides composing the two-component bacteriocins ABP118, Brochocin C and Thermophilin 13 using ColabFold. The amino acid sequence following the first glycine doublet (in bold) was considered as the mature form of the peptides. Uniprot accession numbers: ABP118: Q8KWIO; Q8KWH9. Brochocin C: O85756; O85757. Thermophilin 13: O54454; O54455. All representations are colored with predicted IDDT from a score of 30% (red) to 100% (blue). The disulfide bond is visible in stick representation for all the peptides except BrcB.



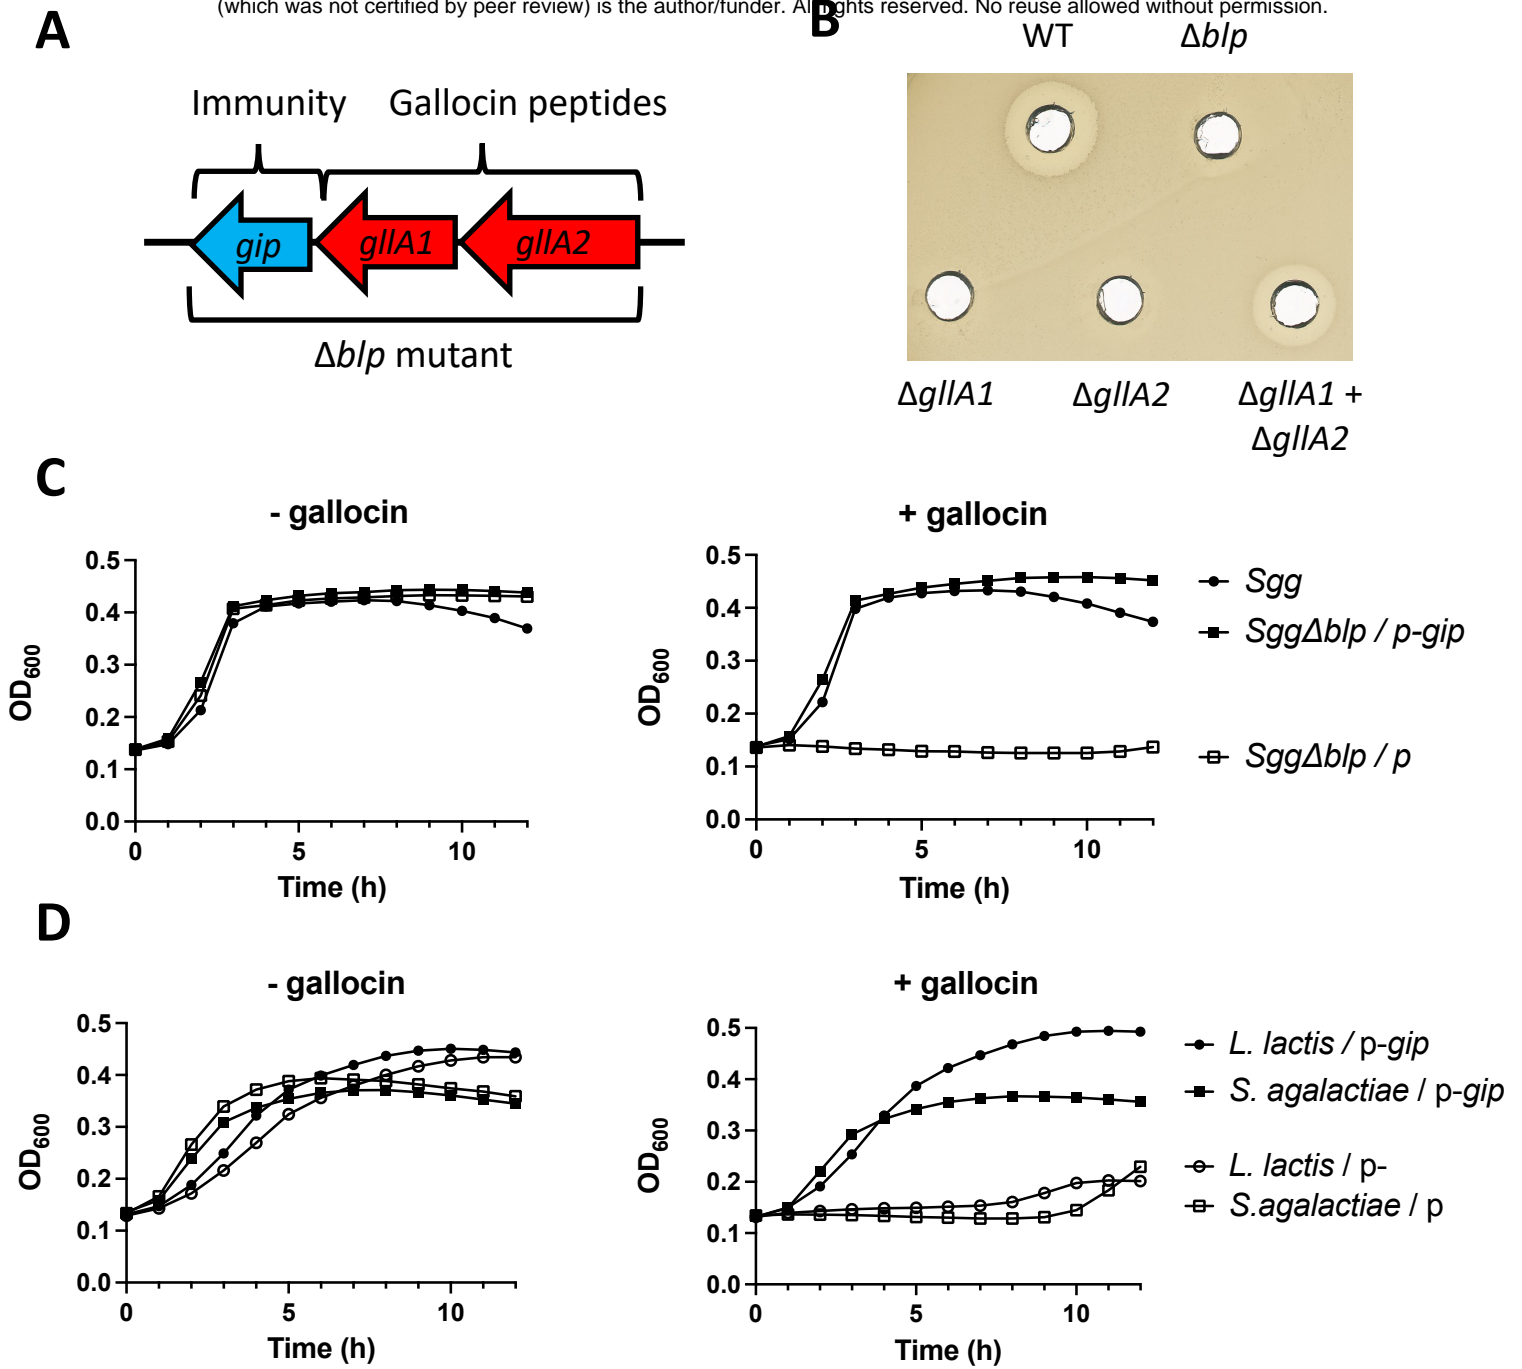

**Figure 1 : Galloicin A is a two-peptide bacteriocin**

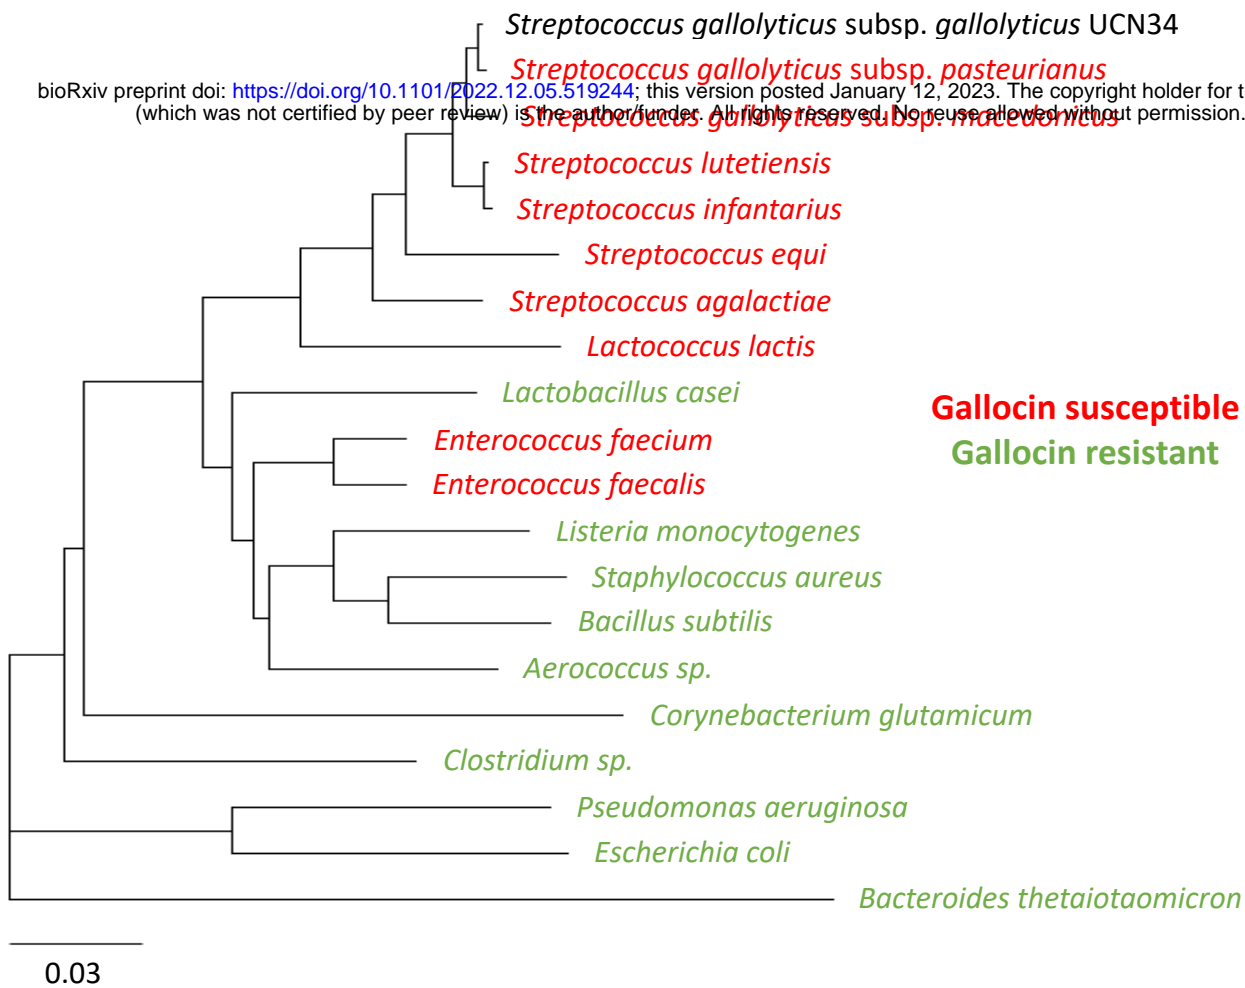

**Figure 2 : Gallocin A is active against most streptococci, lactococci and enterococci.**

**A**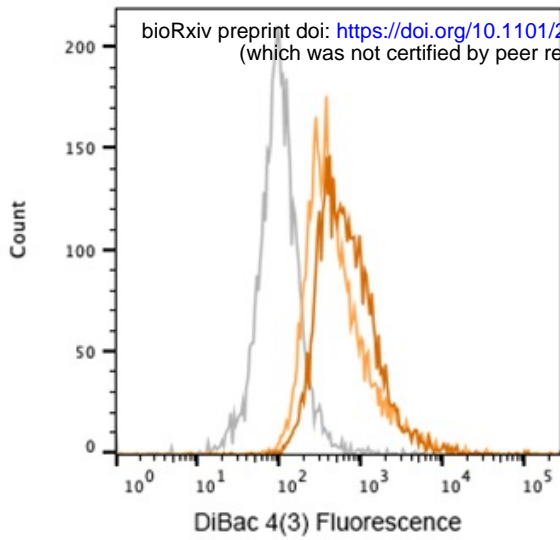**B**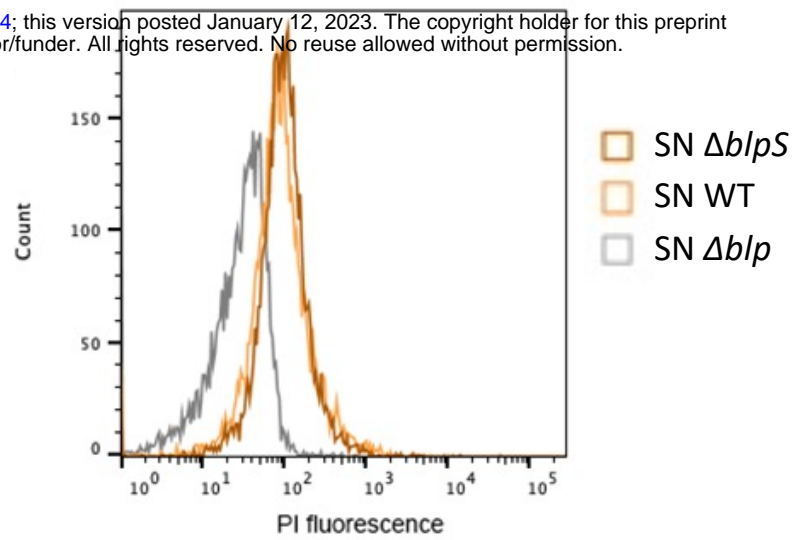**C**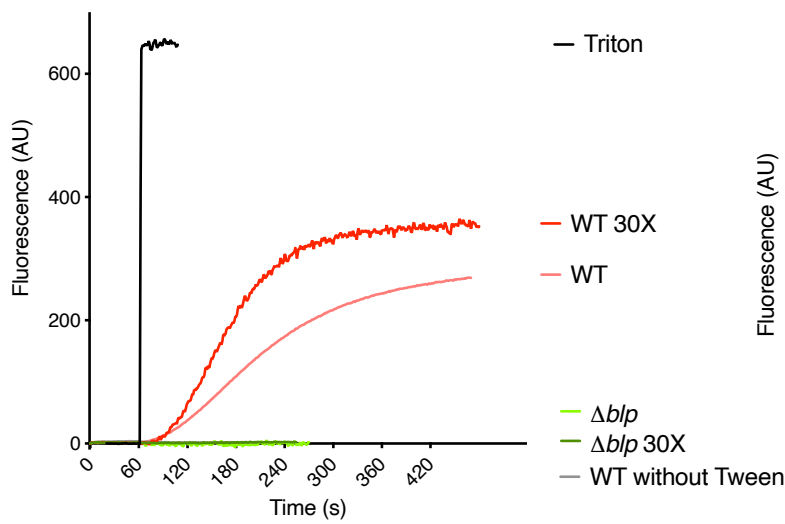**D**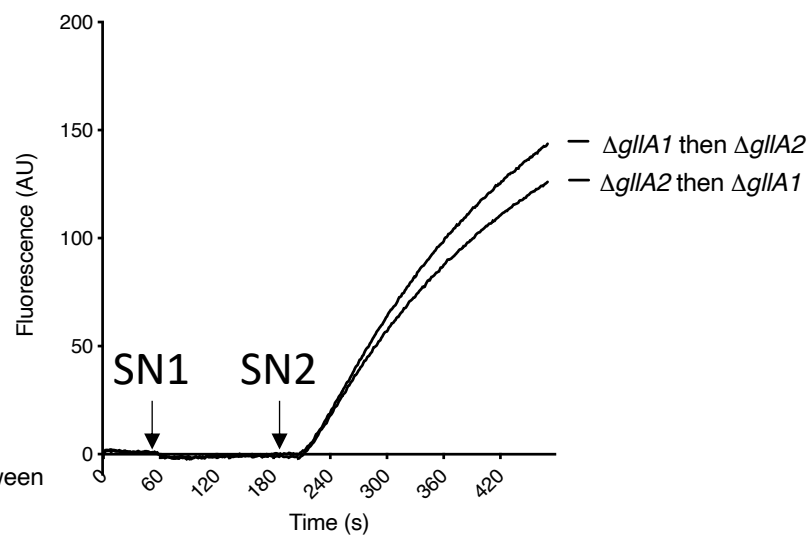

**Figure 3: Gallocin A can permeabilize bacterial membranes and lipid vesicles.**

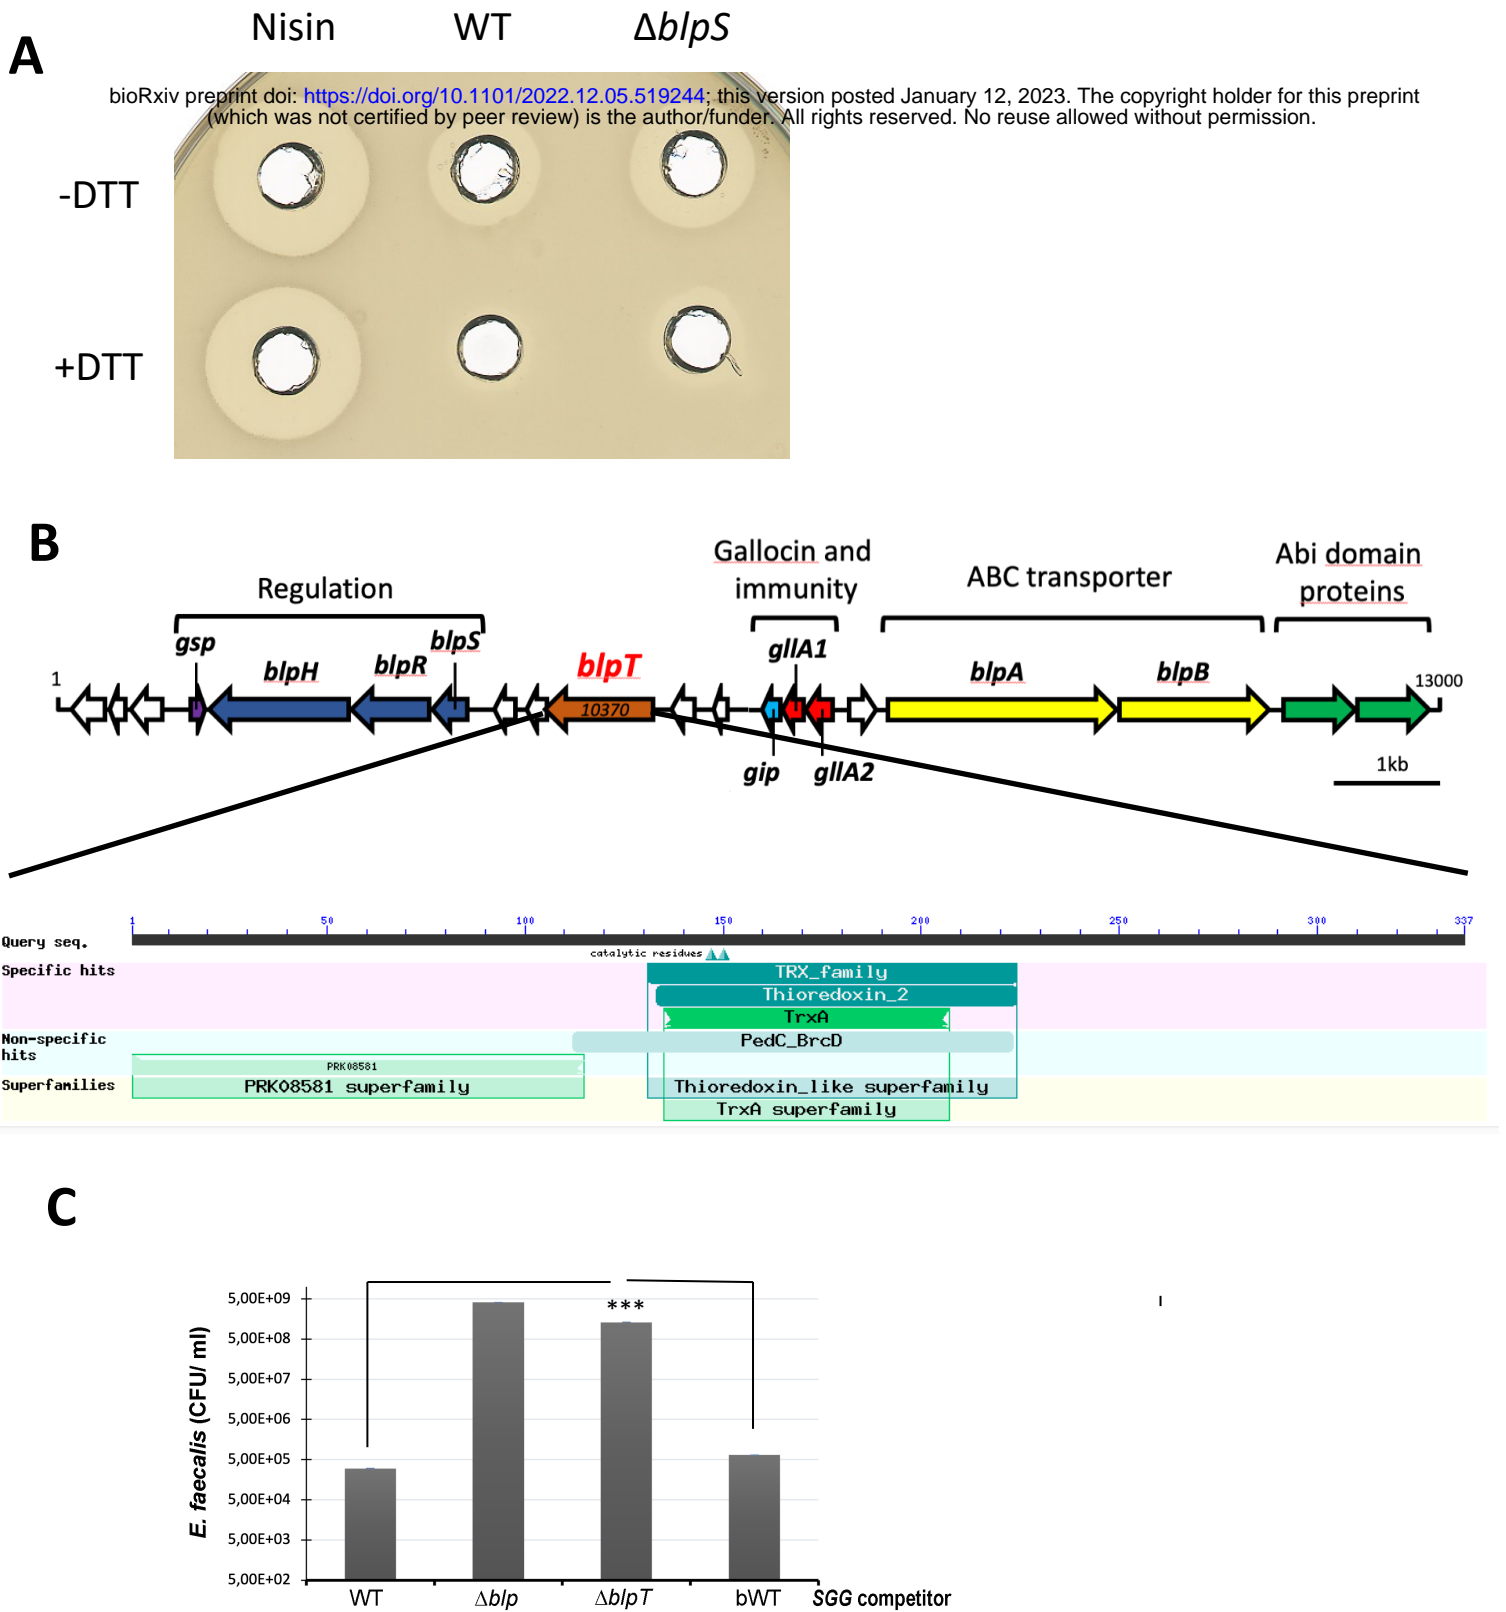

**Figure 4: Gallocin A peptides possess a disulfide bond important for structure and activity.**



**A****Pro-GIIA1****GIIA1**

bioRxiv preprint doi: <https://doi.org/10.1101/2022.12.05.519244>; this version posted January 12, 2023. The copyright holder for this preprint (which was not certified by peer review) is the author/funder. All rights reserved. No reuse allowed without permission.

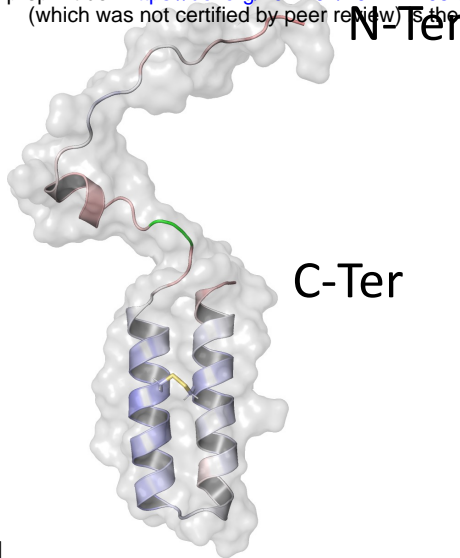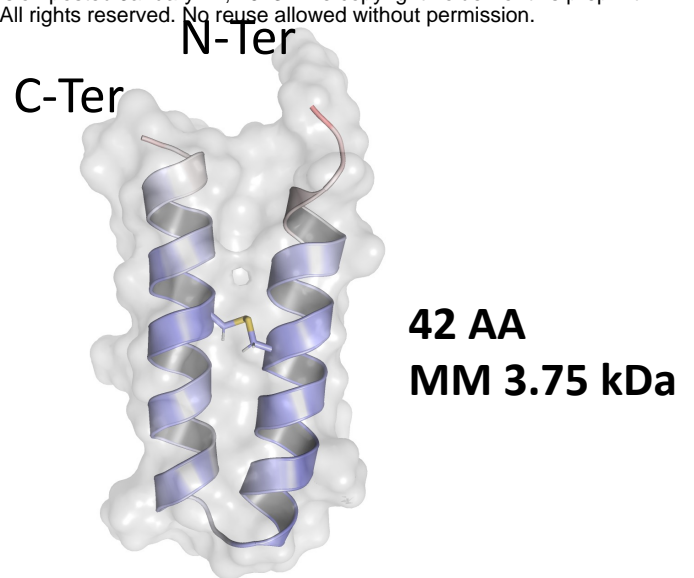**GIIA1**

MSLNKFTNFQELDKNHLQTISGGKGNMGSAIGG**C**IGGVLLAAATGPITGGGA  
AMIC**C**VASGISAYL

**B****Pro-GIIA2****GIIA2**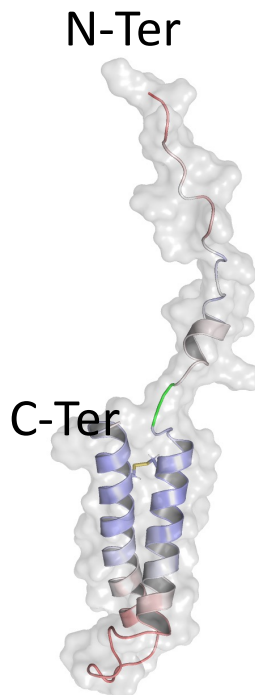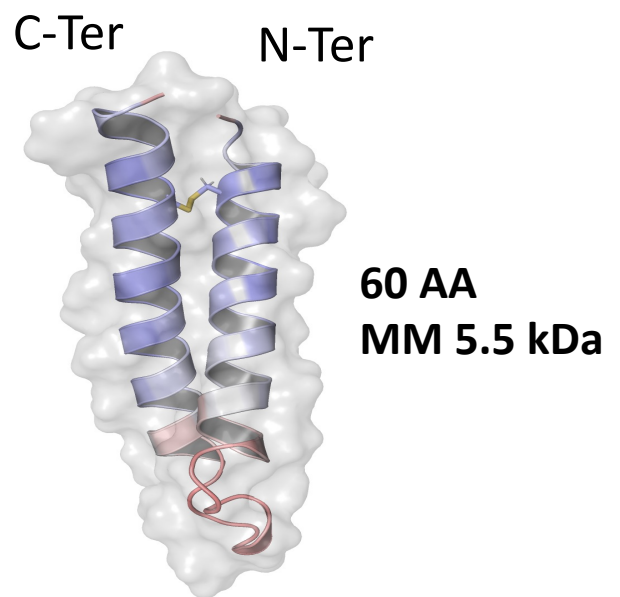**GIIA2**

MNTKTFEQFDVMTDEALSKEGGYSKTD**C**LNAMITGIAGGIVAGGTGAGLVT  
LGVAGLPGAFVGAHIGAIGGGAT**C**VGGMLFN

**Figure 5: Structural models of GIIA1 and GIIA2 predicted using Colabfold.**

**A****GIP**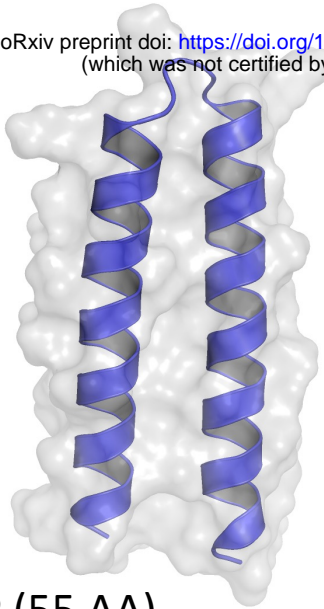**GIP (55 AA)**

MIKYSIIIFVNLVLCYLLINKVFKASND  
 ERETTGKVLILSIVYIVVDILFNASK

**B****GIIA2****GIIA1**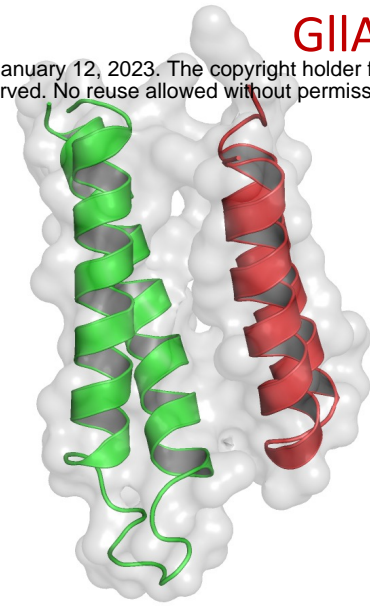**C****GIP****GIIA1**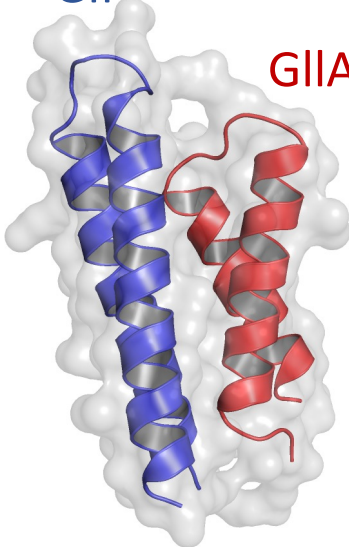**D****GIIA2****GIP**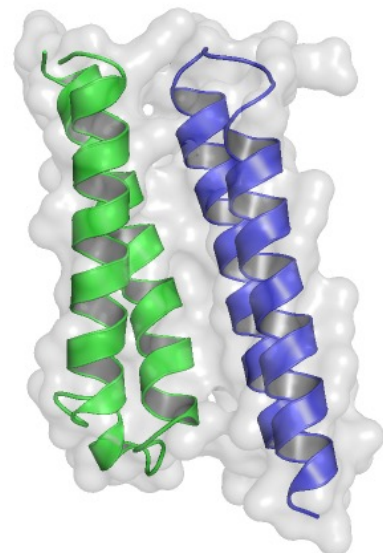**E****GIIA2****GIP****GIIA1**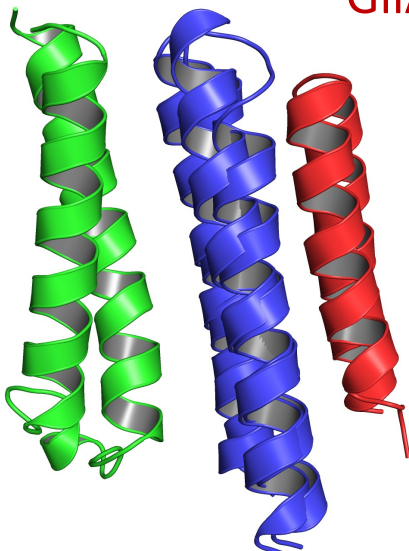

**Figure 6: Structural models of GIP and its interactions with GIIA1, GIIA2.** A) Colabfold modelling of GIP. B, C, D) Colabfold modelling of the interaction between GIIA1/GIIA2 (B), GIP/GIIA1 (C), GIP/GIIA2 (D). E) GIP/GIIA2 and GIP/GIIA2 interaction models aligned on the C $\alpha$  of each GIP.

SGM WT

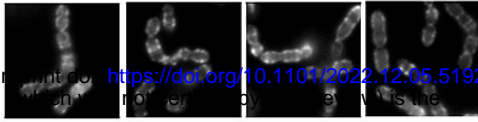

**Mutations in *WalK***

RSM1

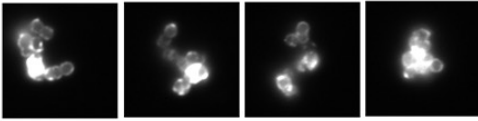

RSM2

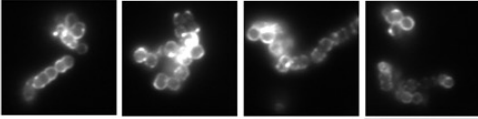

RSM4

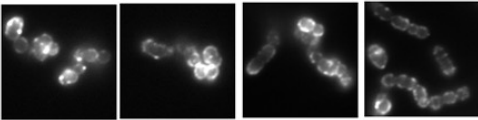

RSM5

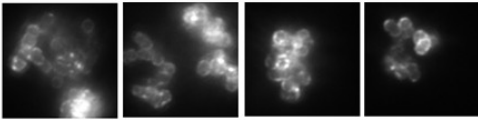

**Mutations in *WalR* (SNP)**

RSM6

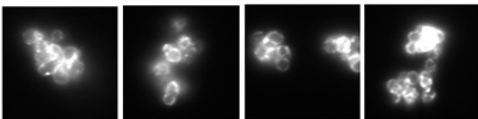

RSM12

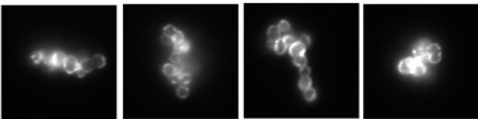

**Mutations in *WalKR***

RSM14

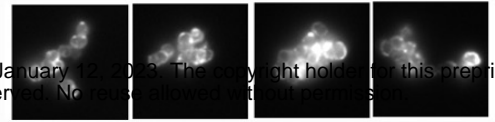

**Mutations in a LysM- protein  
(GALLO\_RS11495)**

RSM7

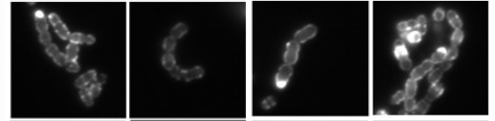

RSM8

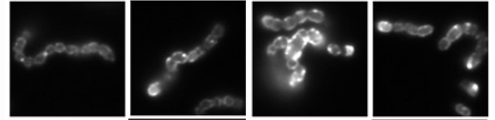

RSM10

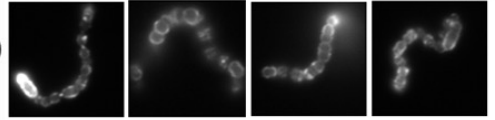

**No specific mutations identified**

RSM3

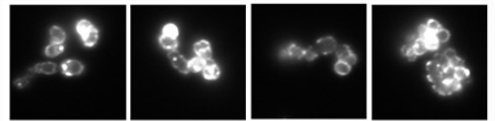

RSM13

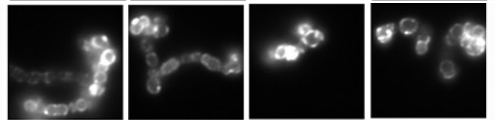

**Figure 7: RSM mutants form aggregates as compared to the parental *SGM* WT.**

Epifluorescence microscopy images of *S. gallolyticus subsp. macedonicus* (*SGM*) WT and RSM 1 to 12 labelled with the Wheat Germ Agglutinin coupled to Alexa 488, a fluorescent lectin binding to the peptidoglycan.

**Table 1: List of strains and primers**

bioRxiv preprint doi: <https://doi.org/10.1101/2022.12.05.519244>; this version posted January 12, 2023. The copyright holder for this preprint (which was not certified by peer review) is the author/funder. All rights reserved. No reuse allowed without permission.

| Number                                                                                                     | Strain                                                      | Source                      |
|------------------------------------------------------------------------------------------------------------|-------------------------------------------------------------|-----------------------------|
| <b>S. gallolyticus strains</b>                                                                             |                                                             |                             |
| NEM 2431                                                                                                   | <i>S. gallolyticus</i> subspecies <i>gallolyticus</i> UCN34 | (Rusniok et al., 2010)      |
| NEM 4838                                                                                                   | UCN34 $\Delta$ blp                                          | (Aymeric et al., 2018)      |
| NEM 4694                                                                                                   | UCN34 $\Delta$ gIIA1                                        | This work                   |
| NEM 4812                                                                                                   | UCN34 $\Delta$ gIIA2                                        | This work                   |
| NEM 4988                                                                                                   | UCN34 $\Delta$ blpT ( <i>gallo_rs10370</i> )                | This work                   |
| NEM 5097                                                                                                   | UCN34 $\Delta$ blpS                                         | (Proutiere et al., 2021)    |
| NEM 1765                                                                                                   | <i>S. gallolyticus</i> subspecies <i>macedonicus</i>        | CIP 105683T                 |
| 150507100801                                                                                               | <i>S. gallolyticus</i> subspecies <i>pasteurianus</i>       | CNR collection (Cochin)     |
| NEM 4801                                                                                                   | UCN34 $\Delta$ blp pTCV Ptet-gip                            | This work                   |
| NEM 4806                                                                                                   | UCN34 $\Delta$ blp pTCV Ptet                                | This work                   |
| <b>Heterologous expression of immunity protein</b>                                                         |                                                             |                             |
| NEM 4828                                                                                                   | <i>Lactococcus lactis</i> pTCV Ptet-gip                     | This work                   |
| NEM 5667                                                                                                   | <i>Lactococcus lactis</i> pTCV                              | This work                   |
| NEM4825                                                                                                    | <i>Streptococcus agalactiae</i> A909 pTCV Ptet-gip          | This work                   |
| NEM3245                                                                                                    | <i>Streptococcus agalactiae</i> A909 pTCV                   | This work                   |
| <b>Strains tested for gallocin sensitivity</b>                                                             |                                                             |                             |
| NEM 4825                                                                                                   | <i>Streptococcus agalactiae</i> A909 pTCV Ptet-gip          | Collection BBPG             |
| NEM 1867                                                                                                   | <i>Streptococcus infantarius</i>                            | CIP106105                   |
| NEM 640                                                                                                    | <i>Streptococcus lutetiensis</i>                            | Collection BBPG             |
| NEM 739                                                                                                    | <i>Streptococcus equi</i>                                   | Collection BBPG             |
| NEM 2526                                                                                                   | <i>S. agalactiae</i> A909                                   | Collection BBPG             |
| NEM 3525                                                                                                   | <i>S. agalactiae</i> NEM316                                 | Collection BBPG             |
| NEM 2312                                                                                                   | <i>S. agalactiae</i> BM110                                  | Collection BBPG             |
| NEM 409                                                                                                    | <i>Enterococcus faecalis</i>                                | Collection BBPG             |
| NEM 489                                                                                                    | <i>Enterococcus faecium</i>                                 | Collection BBPG             |
| NEM 4906                                                                                                   | <i>Lactococcus lactis</i>                                   | Collection BBPG             |
| NEM 4703                                                                                                   | <i>Lactobacillus casei</i>                                  | Collection BBPG             |
| NEM 140                                                                                                    | <i>Listeria monocytogenes</i> F6953                         | Collection BBPG             |
| NEM 466                                                                                                    | <i>Bacillus subtilis</i>                                    | Collection BBPG             |
| NEM 416                                                                                                    | <i>Staphylococcus aureus</i> RN4220                         | Collection BBPG             |
| NEM 453                                                                                                    | <i>Escherichia coli</i>                                     | Collection BBPG             |
| NEM 761                                                                                                    | <i>Aerococcus</i> spp.                                      | Collection BBPG             |
| NEM 486                                                                                                    | <i>Pseudomonas aeruginosa</i>                               | Collection BBPG             |
| NEM 602                                                                                                    | <i>Corynebacterium glutamicum</i>                           | Collection BBPG             |
| <b>Vancomycin resistant Enterococcus</b>                                                                   |                                                             |                             |
| CIP 103510                                                                                                 | <i>E. faecium</i> (VanA)                                    | Collection Institut Pasteur |
| CIP 111159                                                                                                 | <i>E. faecalis</i> (VanB)                                   | Collection Institut Pasteur |
| CIP 111253                                                                                                 | <i>E. faecalis</i> (VanD)                                   | Collection Institut Pasteur |
| CIP 111106                                                                                                 | <i>E. faecalis</i> (VanE)                                   | Collection Institut Pasteur |
| CIP 111107                                                                                                 | <i>E. faecalis</i> (VanG)                                   | Collection Institut Pasteur |
| <b>Competition experiment</b>                                                                              |                                                             |                             |
| NEM 2829                                                                                                   | <i>Enterococcus faecalis</i> OG1RF                          | Collection BBPG             |
| <b><i>Streptococcus gallolyticus</i> subspecies <i>macedonicus</i> mutants resistant to gallocin (RSM)</b> |                                                             |                             |
| NEM 5627                                                                                                   | RSM1                                                        | This work                   |
| NEM 5628                                                                                                   | RSM2                                                        | This work                   |
| NEM 5629                                                                                                   | RSM3                                                        | This work                   |
| NEM 5630                                                                                                   | RSM4                                                        | This work                   |
| NEM 5631                                                                                                   | RSM5                                                        | This work                   |
| NEM 5632                                                                                                   | RSM6                                                        | This work                   |
| NEM 5633                                                                                                   | RSM7                                                        | This work                   |
| NEM 5634                                                                                                   | RSM8                                                        | This work                   |
| NEM 5636                                                                                                   | RSM10                                                       | This work                   |
| NEM 5638                                                                                                   | RSM12                                                       | This work                   |
| NEM 5639                                                                                                   | RSM13                                                       | This work                   |
| NEM 5640                                                                                                   | RSM14                                                       | This work                   |

| Primers                                 | Sequence (5'-3')                            |
|-----------------------------------------|---------------------------------------------|
| <b>Deletions</b>                        |                                             |
| <i>gIIA1</i>                            | TTCTGAATTCGAAACTAGAACTATTGTGCC              |
|                                         | TTCTATAAGTATGCTGAAACTCTCTCCTTATAAA          |
|                                         | TTTATAAGGAGAGAGATATTTTCAGCATACTATAGA        |
|                                         | TTCTGGATCCAGGCAATATTATTGCCAT                |
| <i>gIIA2</i>                            | TTCTGAATTCCTAATGCGGGAGTTTGCCT               |
|                                         | ACTCTCTCTTATAAAATTATTGAATACCTCCCAATAA       |
|                                         | TTATTGGGAGGTATTCAATAATTTTATAAGGAGAGAGT      |
|                                         | TTCTGGATCCAGGCAATATTATTGCCA                 |
| <i>blpT</i><br>( <i>gallo_RS10370</i> ) | TTCTGAATTCATCCAGATAGACCGCC                  |
|                                         | GCAACTGTTTTATCAATGGGAGAGAAAAGTAGCA          |
|                                         | TGCTACTTTTCTCTGCCATTGATAAAACAGTTGC          |
|                                         | TTCTGGATCCGACAGACGGTATGTTAG                 |
| <b>Overexpression</b>                   |                                             |
| <i>gip</i>                              | TTCTGGATCCATTGGGAGGTATTCAAATGATTATAAAATATAG |
|                                         | TTCTCTGCAGCAATAGTAATACATTAT                 |

**Table 2: Single nucleotide polymorphisms detected in RSM mutants as compared to the control *SGM* WT**

| Column1 | level_0    | chr      | position | depth | reference    | alternative            | type  | freebayes_score | strand_balance | fisher_pvalue | frequency | CDS_position    | effect_type                     | codon_change      | gene_name      | mutation_type | prot_effect   | prot_size | effect_impact | name       |
|---------|------------|----------|----------|-------|--------------|------------------------|-------|-----------------|----------------|---------------|-----------|-----------------|---------------------------------|-------------------|----------------|---------------|---------------|-----------|---------------|------------|
| 56      | RSM-1_S3   | assembly | 1609857  | 141   | GCCAGAT      | GCCAGACCAGAT           | INDEL | 4416.47         | 0.471          | 1             | 0.98      | 961_962insTCTGT | frameshift_variant              | atc/aTCTGGTc      | NPFEHBFA_01714 |               | Leu323fs      | 450       | HIGH          | RSM-1_S3   |
| 57      | RSM-1_S3   | assembly | 1967146  | 173   | G            | T                      | SNV   | 5614.57         | 0.402          | 0.405882353   | 0.99      | 17C>A           | missense_variant                | gCc/gAc           | NPFEHBFA_02107 | MISSENSE      | Ala6Asp       | 123       | MODERATE      | RSM-1_S3   |
| 58      | RSM-1_S3   | assembly | 1987074  | 309   | TGT          | TGGT                   | INDEL | 5417.64         | 0.428          | 0.24609502    | 0.54      | 1987075_1987077 | intragenic_variant              |                   | NPFEHBFA_00018 |               |               |           | MODIFIER      | RSM-1_S3   |
| 79      | RSM-2_S4   | assembly | 1609905  | 105   | CGCTGATTGT   | CGCTGATTGGCTGATTGT     | INDEL | 2980.49         | 0.447          | 0.4653761     | 0.90      | 910_911insCAAT  | frameshift_variant              | aca/aCAATCAGCca   | NPFEHBFA_01714 |               | Gly307fs      | 450       | HIGH          | RSM-2_S4   |
| 114     | RSM-3_S5   | assembly | 1967146  | 191   | G            | T                      | SNV   | 6332.62         | 0.458          | 0.460732984   | 1.00      | 17C>A           | missense_variant                | gCc/gAc           | NPFEHBFA_02107 | MISSENSE      | Ala6Asp       | 123       | MODERATE      | RSM-3_S5   |
| 8       | RSM-4_S6   | assembly | 1609857  | 111   | GCCAGATTGGTT | GCCAGATTGGTCCAGATTGGTT | INDEL | 2566.58         | 0.488          | 0.36118636    | 0.74      | 956_957insACCA  | frameshift_variant              | aaa/aaACCAATCTGga | NPFEHBFA_01714 |               | Leu323fs      | 450       | HIGH          | RSM-4_S6   |
| 16      | RSM-5_S7   | assembly | 1609830  | 150   | G            | A                      | SNV   | 4961.5          | 0.493          | 1             | 1.00      | 994C>T          | stop_gained                     |                   | NPFEHBFA_01714 | NONSENSE      | Gln332*       | 450       | HIGH          | RSM-5_S7   |
| 19      | RSM-5_S7   | assembly | 2110152  | 194   | C            | T                      | SNV   | 6434.79         | 0.454          | 1             | 1.00      | 112G>A          | missense_variant                | Ggc/Ggc           | NPFEHBFA_02243 | MISSENSE      | Gly38Ser      | 139       | MODERATE      | RSM-5_S7   |
| 100     | RSM-6_S8   | assembly | 1611243  | 145   | G            | A                      | SNV   | 4753.75         | 0.455          | 1             | 1.00      | 284C>T          | missense_variant                | gCa/gTa           | NPFEHBFA_01715 | MISSENSE      | Ala95Val      | 236       | MODERATE      | RSM-6_S8   |
| 87      | RSM-7_S9   | assembly | 59133    | 116   | ATTTTTTGGTT  | ATTTTTTGGTT            | INDEL | 3769.47         | 0.47           | 1             | 0.99      | 112dupT         | frameshift_variant              | ttg/tTgg          | NPFEHBFA_00076 |               | Trp38fs       | 322       | HIGH          | RSM-7_S9   |
| 90      | RSM-7_S9   | assembly | 1665912  | 103   | C            | T                      | SNV   | 3443.77         | 0.422          | 1             | 0.99      | 1665912C>T      | intragenic_variant              |                   | NPFEHBFA_00018 |               |               |           | MODIFIER      | RSM-7_S9   |
| 91      | RSM-7_S9   | assembly | 2167995  | 122   | G            | A                      | SNV   | 3983.79         | 0.475          | 1             | 1.00      | 403C>T          | stop_gained                     | CaA/Taa           | NPFEHBFA_02313 | NONSENSE      | Gln135*       | 197       | HIGH          | RSM-7_S9   |
| 138     | RSM-8_S10  | assembly | 1028320  | 114   | G            | A                      | SNV   | 3821.48         | 0.421          | 1             | 1.00      | 107C>T          | missense_variant                | cCa/cTa           | NPFEHBFA_01139 | MISSENSE      | Pro36Leu      | 87        | MODERATE      | RSM-8_S10  |
| 139     | RSM-8_S10  | assembly | 2167972  | 163   | G            | T                      | SNV   | 5539.98         | 0.469          | 1             | 0.99      | 426C>A          | stop_gained                     | taC/taA           | NPFEHBFA_02313 | NONSENSE      | Tyr142*       | 197       | HIGH          | RSM-8_S10  |
| 68      | RSM-9_S11  | assembly | 970200   | 81    | G            | A                      | SNV   | 1543.39         | 0.438          | 0.012693076   | 0.59      | 970200G>A       | intragenic_variant              |                   | NPFEHBFA_00018 |               |               |           | MODIFIER      | RSM-9_S11  |
| 72      | RSM-9_S11  | assembly | 1608485  | 93    | C            | T                      | SNV   | 3076.42         | 0.467          | 1             | 0.99      | 1608485C>T      | intragenic_variant              |                   | NPFEHBFA_00018 |               |               |           | MODIFIER      | RSM-9_S11  |
| 128     | RSM-10_S12 | assembly | 890476   | 125   | A            | G                      | SNV   | 4177.47         | 0.464          | 1             | 1.00      | 829A>G          | missense_variant                | Act/Gct           | NPFEHBFA_00992 | MISSENSE      | Thr277Ala     | 366       | MODERATE      | RSM-10_S12 |
| 129     | RSM-10_S12 | assembly | 1111112  | 98    | GAAAAAATG    | GAAAAATG               | INDEL | 3313.57         | 0.449          | 1             | 1.00      | 1111118delA     | intragenic_variant              |                   | NPFEHBFA_00018 |               |               |           | MODIFIER      | RSM-10_S12 |
| 131     | RSM-10_S12 | assembly | 2167989  | 131   | C            | T                      | SNV   | 4416.49         | 0.489          | 1             | 1.00      | 409G>A          | missense_variant                | Gaa/Aaa           | NPFEHBFA_02313 | MISSENSE      | Glu137Iys     | 197       | MODERATE      | RSM-10_S12 |
| 107     | RSM-11_S13 | assembly | 987794   | 132   | ACCGA        | ACGA                   | INDEL | 4361.88         | 0.473          | 1             | 0.99      | 438delC         | frameshift_variant              | acc/              | NPFEHBFA_01100 |               | Glu147fs      | 520       | HIGH          | RSM-11_S13 |
| 119     | RSM-12_S14 | assembly | 121316   | 138   | T            | G                      | SNV   | 4694.83         | 0.486          | 1             | 1.00      | 955T>G          | stop_lost+splice_region_variant | Taa/Gaa           | NPFEHBFA_00166 | MISSENSE      | Ter319Gluext* | 318       | HIGH          | RSM-12_S14 |
| 122     | RSM-12_S14 | assembly | 1611178  | 130   | G            | A                      | SNV   | 4376.41         | 0.408          | 1             | 1.00      | 349C>T          | missense_variant                | Cgt/Tgt           | NPFEHBFA_01715 | MISSENSE      | Arg117Cys     | 236       | MODERATE      | RSM-12_S14 |
| 35      | RSM-13_S15 | assembly | 404530   | 153   | A            | G                      | SNV   | 4984.05         | 0.49           | 1             | 1.00      | 314T>C          | missense_variant                | gTa/gCa           | NPFEHBFA_00464 | MISSENSE      | Val105Ala     | 193       | MODERATE      | RSM-13_S15 |
| 36      | RSM-13_S15 | assembly | 518528   | 144   | G            | G                      | SNV   | 4789.74         | 0.486          | 1             | 1.00      | 193C>G          | missense_variant                | Ctg/Gcg           | NPFEHBFA_00589 | MISSENSE      | Pro65Ala      | 292       | MODERATE      | RSM-13_S15 |
| 38      | RSM-13_S15 | assembly | 1847713  | 158   | T            | A                      | SNV   | 3277.13         | 0.408          | 0.867232731   | 0.62      | 1847713T>A      | intragenic_variant              |                   | NPFEHBFA_00018 |               |               |           | MODIFIER      | RSM-13_S15 |
| 2       | RSM-14_S16 | assembly | 1609544  | 106   | G            | A                      | SNV   | 3551.39         | 0.491          | 1             | 1.00      | 1280C>T         | missense_variant                | tCg/tTg           | NPFEHBFA_01714 | MISSENSE      | Ser427Leu     | 450       | MODERATE      | RSM-14_S16 |
| 3       | RSM-14_S16 | assembly | 2113956  | 123   | C            | T                      | SNV   | 4184.54         | 0.488          | 1             | 1.00      | 26G>A           | missense_variant                | gGa/gAa           | NPFEHBFA_02247 | MISSENSE      | Gly9Glu       | 419       | MODERATE      | RSM-14_S16 |
